# Supplementary material
Source: MDPI journal article supplement (https://www.mdpi.com/2073-4352/5/4/650)
Supplement: s1 [file s1]

## Supplementary Information

## Crystal Structures, Thermal Analysis and Dissolution Behavior of New Solid Forms of the Antiviral Drug Arbidol with Dicarboxylic Acids

Alex N. Manin <sup>1</sup>, Artem O. Surov <sup>1,2</sup>, Andrei V. Churakov <sup>3</sup> and German L. Perlovich <sup>1,2,\*</sup>

<sup>1</sup> Department of Physical Chemistry of Drugs, Institution of Russian Academy of Sciences, G.A. Krestov Institute of Solution Chemistry of the Russian Academy of Sciences, Ivanovo 153045, Russia; E-Mails: alexnmanin@gmail.com (A.N.M.); artsurov@yandex.ru (A.O.S.)

<sup>2</sup> Department of Chemistry, Lomonosov Moscow State University, 1-3 Leninskiye gory, Moscow 119991, Russia

<sup>3</sup> Department of Crystal Chemistry and X-ray Diffraction Analysis, Kurnakov Institute of General and Inorganic Chemistry of the Russian Academy of Sciences, Leninskii Prospekt 31, Moscow 119991, Russia; E-Mail: churakov@igis.ras.ru

\* Author to whom correspondence should be addressed; E-Mail: germanper@yandex.ru; Tel.: +7-4932-533-784; Fax: +7-4932-336-237.

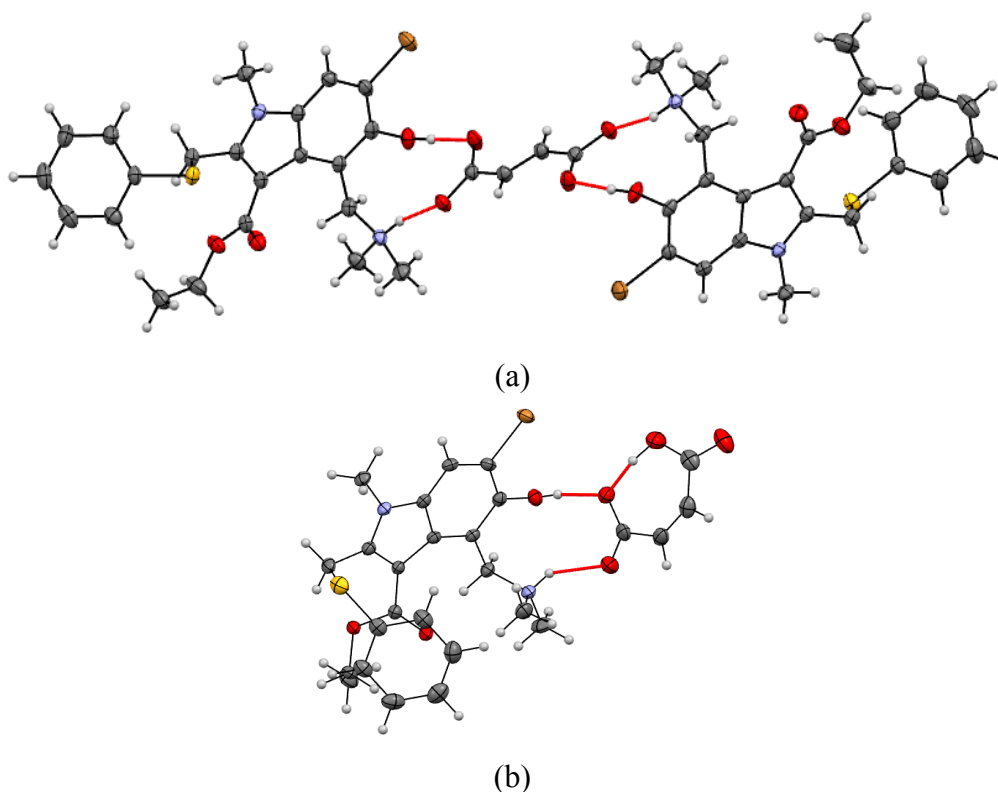

Figure S1. Cont.

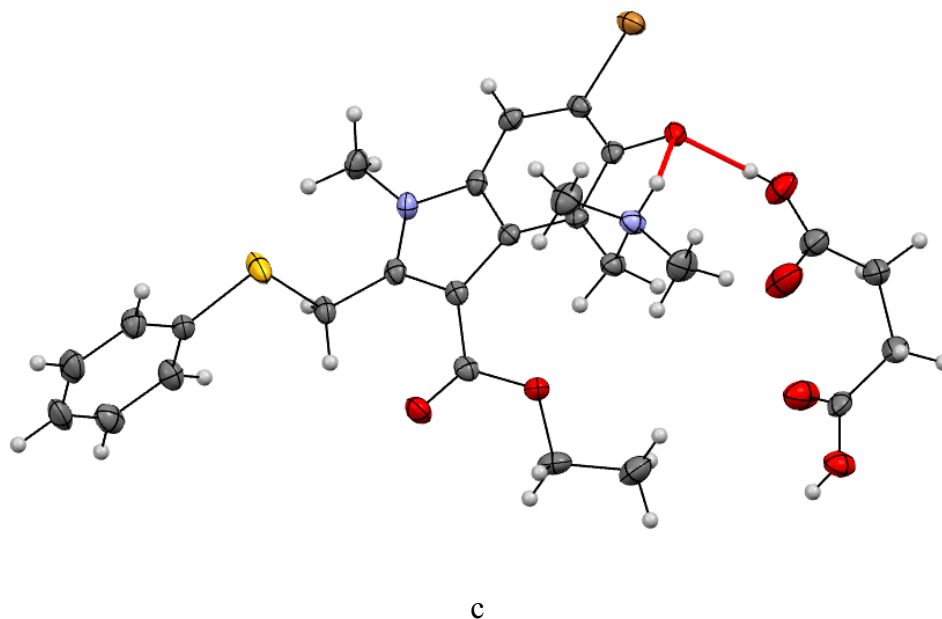

**Figure S1.** Asymmetric units in (a) [Arb + Fum], (b) [Arb + Mlc], (c) [Arb + Suc]. Displacement ellipsoids are shown at 50% probability.

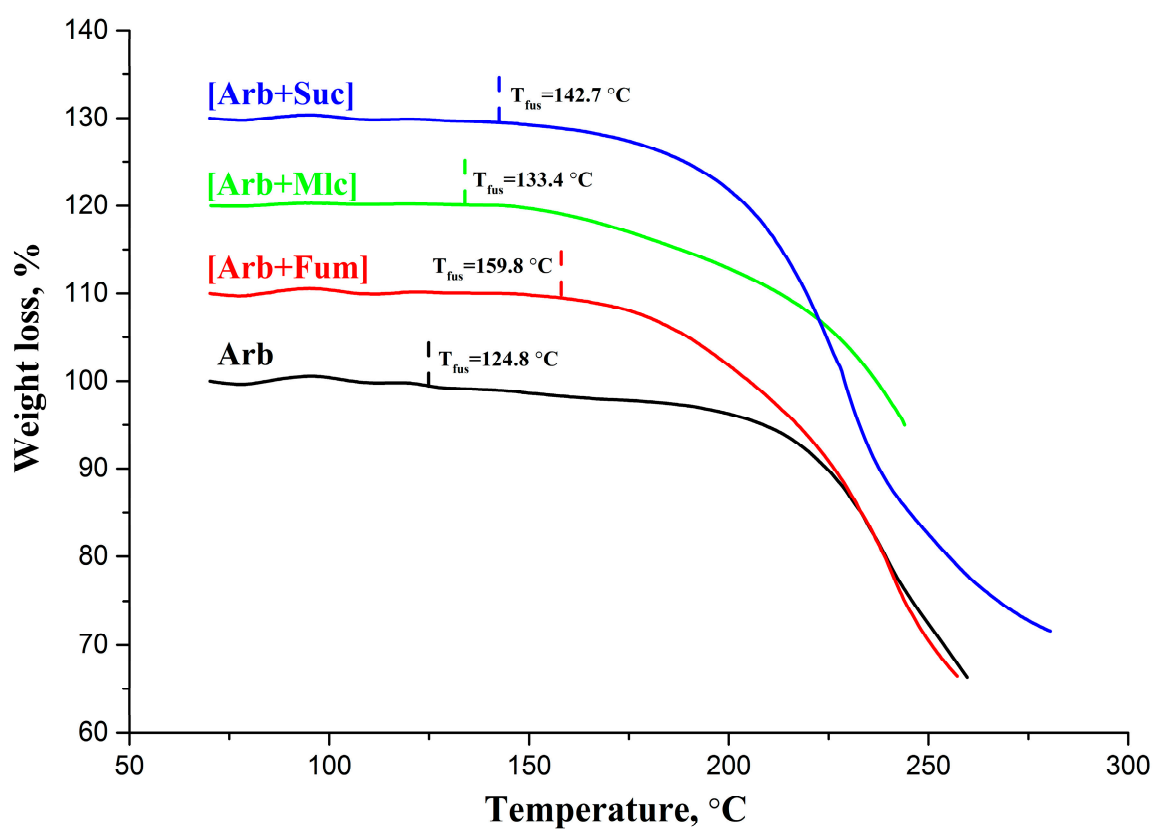

**Figure S2.** TG thermograms of **Arb** (black line); [**Arb + Fum**] (red line); [**Arb + Mlc**] (green line) and [**Arb + Suc**] (blue line)

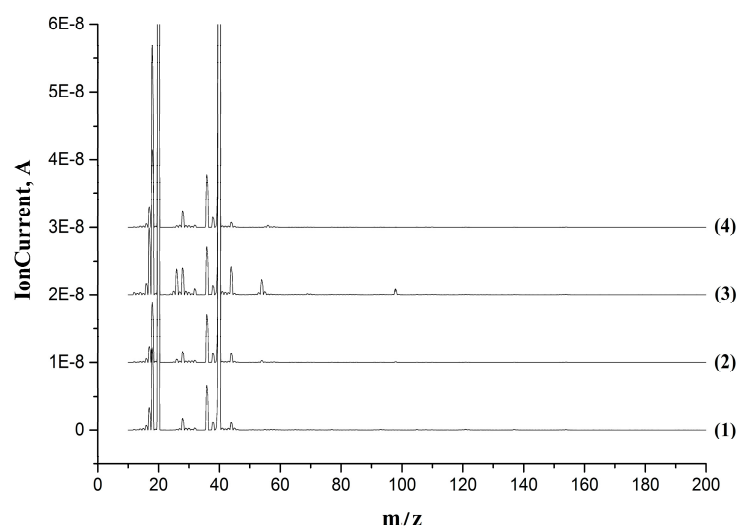

(a)

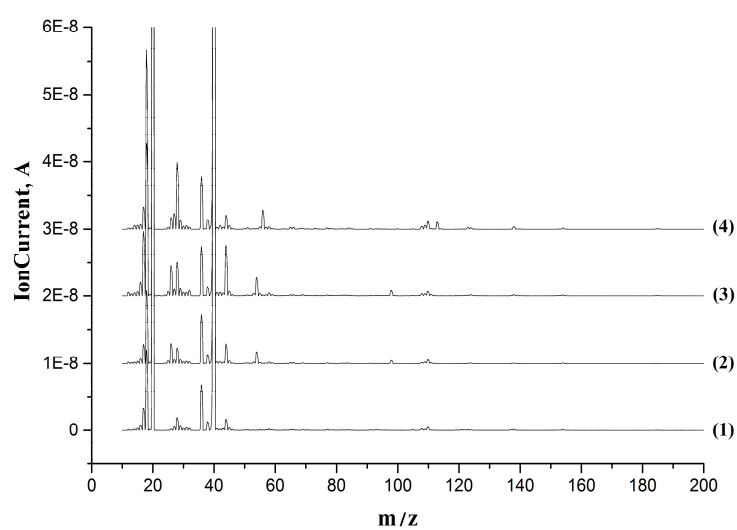

(b)

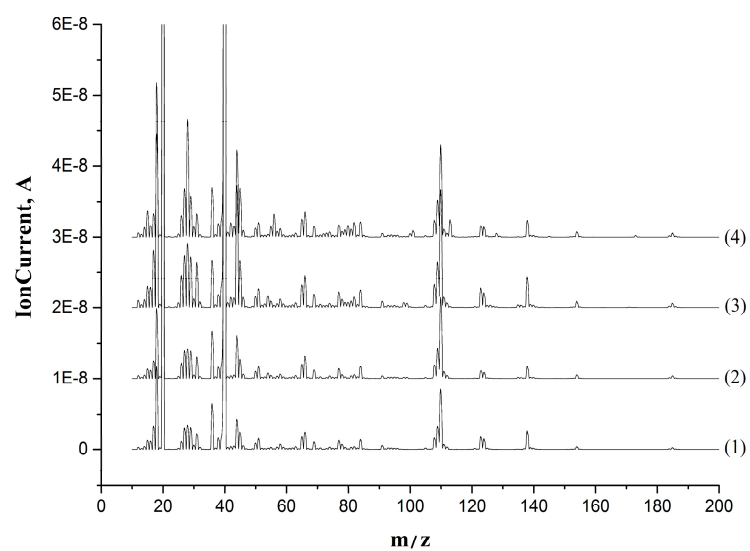

(c)

**Figure S3.** Mass spectrometric curves for **Arb** (1); [**Arb** + **Fum**] (2); [**Arb** + **Mlc**] (3); [**Arb** + **Suc**] (4) at different temperature: (a) at 175 °C; (b) at 205 °C; and (c) at 245 °C.

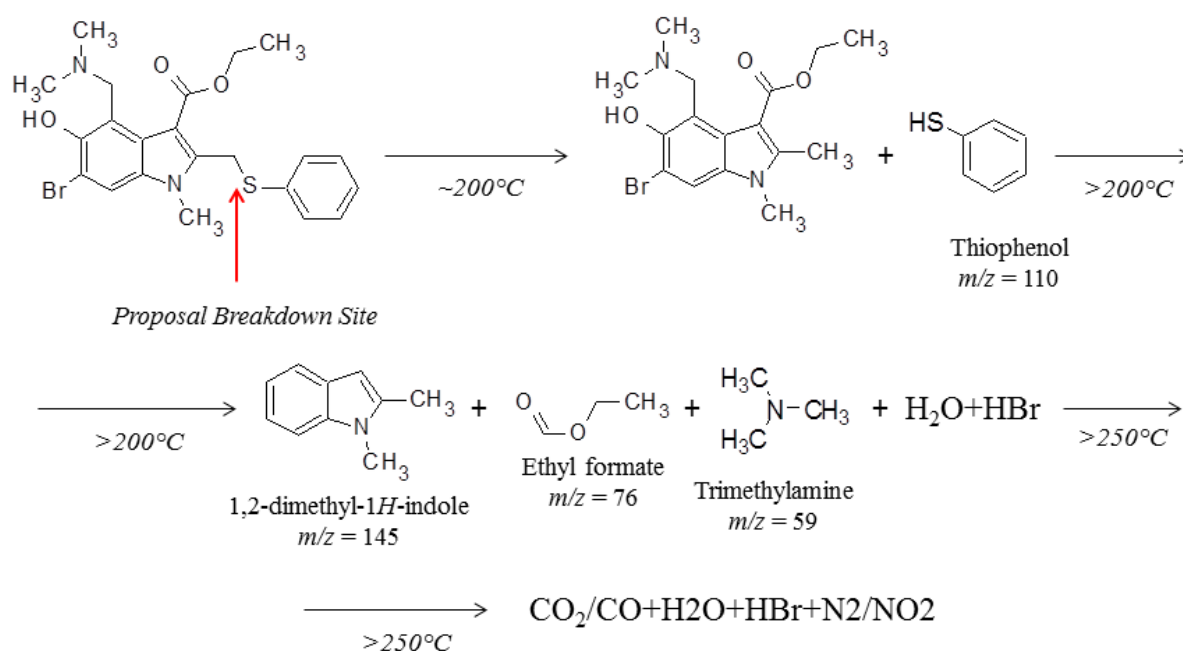

**Scheme S1.** Proposed thermal degradation of Arb.

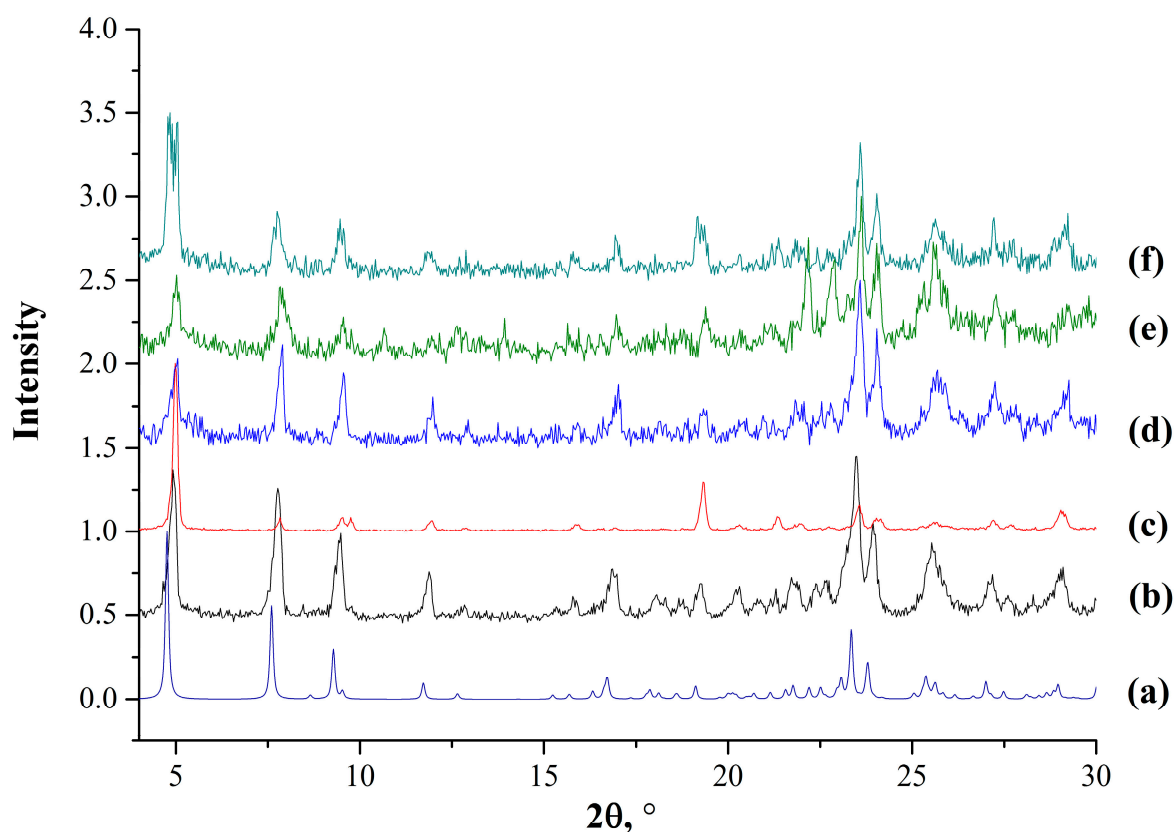

**Figure S4.** XRPD analysis of: (a) simulated pattern of [Arb + HCl + H<sub>2</sub>O] based on the SAJPUQ crystal structure; the residual materials after solubility of (b) arbidol base, (c) [Arb + HCl + H<sub>2</sub>O], (d) [Arb + Fum], (e) [Arb + Mlc], and (f) [Arb + Suc] in pH 1.2 solution.

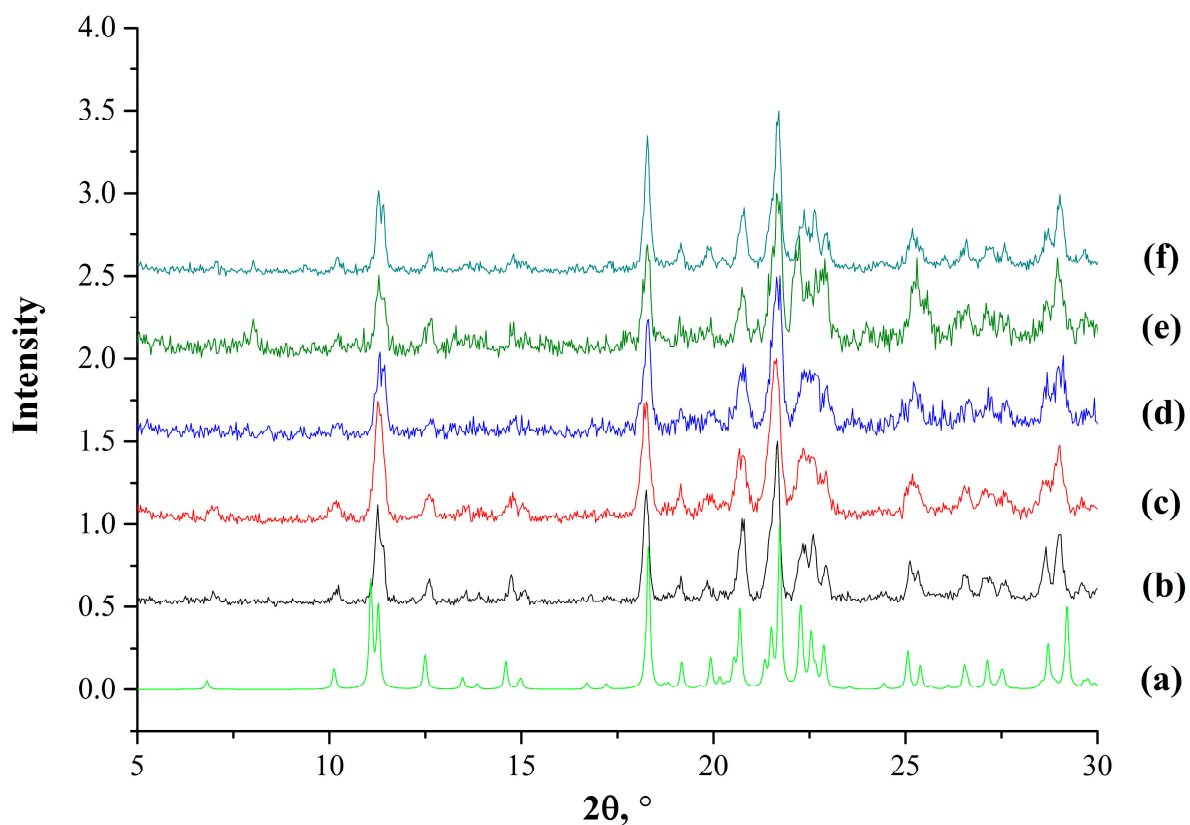

**Figure S5.** XRPD analysis of: (a) simulated pattern of arbidol base (ref. code SAJPOK) and the residual materials after solubility of (b) arbidol base, (c) [Arb + HCl + H<sub>2</sub>O], (d) [Arb + Fum], (e) [Arb + Mlc], and (f) [Arb + Suc] in pH 6.8 solution.
