# Supplementary material
Source: MDPI journal article supplement (https://www.mdpi.com/2073-4352/5/4/650)
Supplement: s1 [file s1]

Archive with 4 entries (4 files):
- crystals-05-00650-supplementary.pdf
- 1433016.cif
- 1433017.cif
- 1433018.cif
