# Supplementary material
Source: MDPI journal article supplement (https://www.mdpi.com/2073-4352/5/4/650)
Supplement: s1 [file s1 › 1433016.cif]

 
data_z 

_iucr_refine_instructions_details
;
TITL z in P2(1)/n
CELL 0.71073  10.4180  14.7052  17.8673  90.000  99.129  90.000
ZERR    4.00   0.0011   0.0015   0.0018   0.000   0.002   0.000
LATT  1
SYMM 0.5-X, 0.5+Y, 0.5-Z
SFAC C H N O S BR
UNIT 104 124 8 28 4 4
TEMP -93
SIZE .35 .25 .25
 
EQIV $1 0.5-X, 0.5+Y, 0.5-Z
HTAB N2 O1
HTAB O23 O1
HTAB O21 O1_$1
 
L.S. 10
BOND $H
ACTA
CONF
FMAP 2
PLAN 6
OMIT -2 54
OMIT 0 1 1
OMIT 1 1 3
OMIT 1 1 2
OMIT -1 0 1
 
WGHT    0.029800    0.775600
FVAR       0.11832   0.44199
S1    5    0.287455    0.487845    0.737327    11.00000    0.05539    0.02179 =
         0.02921   -0.00313    0.02380   -0.00124
BR1   6    0.652971    0.213783    0.419263    11.00000    0.02694    0.02309 =
         0.03207   -0.00058    0.00898    0.00608
N1    3    0.467313    0.445986    0.603534    11.00000    0.02218    0.02601 =
         0.01525   -0.00272    0.00240   -0.00154
N2    3    0.116362    0.266307    0.364771    11.00000    0.02207    0.02064 =
         0.02500   -0.00411    0.00077    0.00084
H2    2    0.177407    0.230794    0.349754    11.00000    0.02817
O1    4    0.370409    0.241111    0.345374    11.00000    0.03045    0.01775 =
         0.01707   -0.00212    0.00326    0.00049
O2    4    0.151679    0.546375    0.426732    11.00000    0.02390    0.02197 =
         0.02138    0.00135    0.00309    0.00478
O3    4    0.099103    0.578921    0.541119    11.00000    0.02728    0.02913 =
         0.02908   -0.00602    0.00786    0.00492
C1    1    0.356199    0.495502    0.599476    11.00000    0.02351    0.01997 =
         0.01839    0.00029    0.00703   -0.00317
C2    1    0.275688    0.477802    0.531090    11.00000    0.02045    0.01781 =
         0.01964   -0.00093    0.00557   -0.00270
C3    1    0.341158    0.410485    0.491805    11.00000    0.01979    0.01646 =
         0.01832    0.00197    0.00492   -0.00102
C4    1    0.308483    0.356519    0.426052    11.00000    0.02214    0.01611 =
         0.01865    0.00119    0.00280    0.00002
C5    1    0.400828    0.295033    0.405657    11.00000    0.02505    0.01485 =
         0.01695    0.00212    0.00447   -0.00154
C6    1    0.524896    0.289829    0.451705    11.00000    0.02135    0.01717 =
         0.02183    0.00157    0.00952    0.00167
C7    1    0.556075    0.336688    0.518731    11.00000    0.01793    0.02112 =
         0.02037    0.00419    0.00277   -0.00067
AFIX  43
H7    2    0.637950    0.329500    0.550187    11.00000   -1.20000
AFIX   0
C8    1    0.461771    0.395074    0.538115    11.00000    0.02104    0.02043 =
         0.01604    0.00054    0.00415   -0.00353
C9    1    0.576862    0.444224    0.665943    11.00000    0.02581    0.03550 =
         0.01948   -0.00186   -0.00060   -0.00100
AFIX 137
H9A   2    0.552784    0.476151    0.709821    11.00000   -1.50000
H9B   2    0.652021    0.474323    0.650036    11.00000   -1.50000
H9C   2    0.599121    0.381017    0.679752    11.00000   -1.50000
AFIX   0
C10   1    0.335806    0.557675    0.662354    11.00000    0.02965    0.02262 =
         0.01817   -0.00238    0.00878   -0.00325
AFIX  23
H10A  2    0.267087    0.602614    0.644288    11.00000   -1.20000
H10B  2    0.417075    0.590893    0.681438    11.00000   -1.20000
AFIX   0
C11   1    0.165683    0.537547    0.502861    11.00000    0.02241    0.01655 =
         0.02304   -0.00248    0.00455   -0.00410
C12   1    0.176948    0.359246    0.376758    11.00000    0.02583    0.01722 =
         0.02377   -0.00225   -0.00105    0.00070
AFIX  23
H12A  2    0.118558    0.399216    0.400648    11.00000   -1.20000
H12B  2    0.186069    0.385788    0.326953    11.00000   -1.20000
AFIX   0
C13   1    0.240296    0.569483    0.800252    11.00000    0.02439    0.02525 =
         0.01800   -0.00179    0.00374    0.00308
C14   1    0.279946    0.659576    0.803302    11.00000    0.02533    0.03013 =
         0.02738   -0.00514    0.00744   -0.00238
AFIX  43
H14A  2    0.335506    0.681165    0.769863    11.00000   -1.20000
AFIX   0
C15   1    0.238102    0.718131    0.855444    11.00000    0.03043    0.02987 =
         0.03428   -0.01035   -0.00094    0.00046
AFIX  43
H15A  2    0.264366    0.780062    0.857215    11.00000   -1.20000
AFIX   0
C16   1    0.158479    0.686800    0.904757    11.00000    0.03113    0.04558 =
         0.02727   -0.01361    0.00522    0.00974
AFIX  43
H16A  2    0.130032    0.727143    0.940288    11.00000   -1.20000
AFIX   0
C17   1    0.120292    0.596810    0.902353    11.00000    0.03165    0.04837 =
         0.02468   -0.00026    0.01239    0.00508
AFIX  43
H17A  2    0.066753    0.575107    0.936871    11.00000   -1.20000
AFIX   0
C18   1    0.159535    0.538269    0.850052    11.00000    0.03311    0.02928 =
         0.02301   -0.00013    0.00793   -0.00251
AFIX  43
H18A  2    0.131587    0.476698    0.847929    11.00000   -1.20000
AFIX   0
C19   1    0.047838    0.605304    0.390583    11.00000    0.02663    0.02312 =
         0.03794    0.00728    0.00274    0.00628
AFIX  23
H19A  2    0.062740    0.668657    0.408629    11.00000   -1.20000
H19B  2   -0.037106    0.584586    0.402423    11.00000   -1.20000
AFIX   0
C20   1    0.049522    0.599870    0.307021    11.00000    0.03828    0.04090 =
         0.03369    0.01165   -0.00059    0.00625
AFIX 137
H20A  2   -0.018979    0.638933    0.280199    11.00000   -1.50000
H20B  2    0.034387    0.536877    0.289979    11.00000   -1.50000
H20C  2    0.134259    0.620244    0.296219    11.00000   -1.50000
AFIX   0
C21   1    0.002357    0.268510    0.303433    11.00000    0.02551    0.04005 =
         0.03425   -0.00510   -0.00861   -0.00256
AFIX 137
H21A  2   -0.034028    0.207173    0.295451    11.00000   -1.50000
H21B  2    0.029502    0.290259    0.256510    11.00000   -1.50000
H21C  2   -0.063733    0.309552    0.317808    11.00000   -1.50000
AFIX   0
C22   1    0.080327    0.229736    0.436176    11.00000    0.03938    0.03431 =
         0.03509    0.00490    0.00522   -0.00577
AFIX 137
H22A  2    0.044253    0.168448    0.427114    11.00000   -1.50000
H22B  2    0.015208    0.269458    0.453265    11.00000   -1.50000
H22C  2    0.157766    0.227192    0.475224    11.00000   -1.50000
AFIX   0
O21   4    0.114980    0.576685    0.102822    11.00000    0.03310    0.02082 =
         0.03744   -0.00521   -0.00034    0.00140
O22   4    0.320512    0.575690    0.160063    11.00000    0.03857    0.03287 =
         0.04536   -0.00600   -0.01275    0.00338
O23   4    0.417672    0.319338    0.227013    11.00000    0.03036    0.04891 =
         0.02975    0.01583    0.00625    0.00178
PART   1
O24   4    0.214898    0.364456    0.200494    21.00000    0.03555    0.07328 =
         0.04467    0.02571    0.01648    0.01723
PART   2
O25   4    0.209581    0.317596    0.181646   -21.00000    0.02942    0.09391 =
         0.05686    0.03317   -0.00559   -0.01343
PART   0
C23   1    0.232052    0.540998    0.117591    11.00000    0.03604    0.02144 =
         0.01940    0.00552    0.00175    0.00012
C24   1    0.247078    0.456133    0.073035    11.00000    0.04765    0.02859 =
         0.02477    0.00041    0.00207    0.00939
AFIX  23
H24A  2    0.265433    0.473270    0.022202    11.00000   -1.20000
H24B  2    0.164183    0.421935    0.066088    11.00000   -1.20000
AFIX   0
C25   1    0.355356    0.394935    0.111320    11.00000    0.03903    0.02972 =
         0.02659    0.00347    0.00760    0.00945
AFIX  23
H25A  2    0.375014    0.348413    0.074720    11.00000   -1.20000
H25B  2    0.434801    0.431722    0.126521    11.00000   -1.20000
AFIX   0
C26   1    0.319808    0.348471    0.179921    11.00000    0.02951    0.03451 =
         0.02935    0.00715    0.00437    0.00273
H1    2    0.117313    0.624231    0.123938    11.00000    0.04858
H3    2    0.397463    0.291755    0.262062    11.00000    0.04826
 
HKLF 4
 
REM  z in P2(1)/n
REM R1 =  0.0303 for   4872 Fo > 4sig(Fo)  and  0.0419 for all   5895 data
REM    360 parameters refined using      0 restraints
 
END  
     
WGHT      0.0298      0.7756 
REM Highest difference peak  0.342,  deepest hole -0.290,  1-sigma level  0.056
Q1    1   0.2246  0.5132  0.7150  11.00000  0.05    0.34
Q2    1   0.2495  0.3603  0.4025  11.00000  0.05    0.30
Q3    1   0.2994  0.4440  0.5016  11.00000  0.05    0.29
Q4    1   0.2641  0.5302  0.7701  11.00000  0.05    0.29
Q5    1   0.2357  0.5044  0.5162  11.00000  0.05    0.29
Q6    1   0.4556  0.2825  0.4371  11.00000  0.05    0.29

;
 
_audit_creation_method            SHELXL-97 
_chemical_name_systematic 
; 
 ? 
; 
_chemical_name_common             ? 
_chemical_melting_point           ? 
_chemical_formula_moiety          'C22 H25 Br N2 O3 S, C4 H6 O4'
_chemical_formula_sum 
 'C26 H31 Br N2 O7 S' 
_chemical_formula_weight          595.50 
 
loop_ 
 _atom_type_symbol 
 _atom_type_description 
 _atom_type_scat_dispersion_real 
 _atom_type_scat_dispersion_imag 
 _atom_type_scat_source 
 'C'  'C'   0.0033   0.0016 
 'International Tables Vol C Tables 4.2.6.8 and 6.1.1.4' 
 'H'  'H'   0.0000   0.0000 
 'International Tables Vol C Tables 4.2.6.8 and 6.1.1.4' 
 'N'  'N'   0.0061   0.0033 
 'International Tables Vol C Tables 4.2.6.8 and 6.1.1.4' 
 'O'  'O'   0.0106   0.0060 
 'International Tables Vol C Tables 4.2.6.8 and 6.1.1.4' 
 'S'  'S'   0.1246   0.1234 
 'International Tables Vol C Tables 4.2.6.8 and 6.1.1.4' 
 'Br'  'Br'  -0.2901   2.4595 
 'International Tables Vol C Tables 4.2.6.8 and 6.1.1.4' 
 
_symmetry_cell_setting            monoclinic
_symmetry_space_group_name_H-M    'P 21/n'
_symmetry_space_group_name_Hall   '-P 2yn'
 
loop_ 
 _symmetry_equiv_pos_as_xyz 
 'x, y, z' 
 '-x+1/2, y+1/2, -z+1/2' 
 '-x, -y, -z' 
 'x-1/2, -y-1/2, z-1/2' 
 
_cell_length_a                    10.4180(11) 
_cell_length_b                    14.7052(15) 
_cell_length_c                    17.8673(18) 
_cell_angle_alpha                 90.00 
_cell_angle_beta                  99.129(2) 
_cell_angle_gamma                 90.00 
_cell_volume                      2702.6(5) 
_cell_formula_units_Z             4 
_cell_measurement_temperature     180(2) 
_cell_measurement_reflns_used     5948
_cell_measurement_theta_min       2.445
_cell_measurement_theta_max       27.577
 
_exptl_crystal_description        prism
_exptl_crystal_colour             colourless
_exptl_crystal_size_max           0.35 
_exptl_crystal_size_mid           0.25 
_exptl_crystal_size_min           0.25 
_exptl_crystal_density_meas       ? 
_exptl_crystal_density_diffrn     1.464 
_exptl_crystal_density_method     'not measured' 
_exptl_crystal_F_000              1232 
_exptl_absorpt_coefficient_mu     1.645 
_exptl_absorpt_correction_type    multi-scan
_exptl_absorpt_correction_T_min   0.5967 
_exptl_absorpt_correction_T_max   0.6838 
_exptl_absorpt_process_details    'SADABS (Bruker, 2008)'
 
_exptl_special_details 
; 
 ? 
; 
 
_diffrn_ambient_temperature       180(2) 
_diffrn_radiation_wavelength      0.71073 
_diffrn_radiation_type            MoK\a 
_diffrn_radiation_source          'fine-focus sealed tube' 
_diffrn_radiation_monochromator   graphite 
_diffrn_measurement_device_type   'Bruker SMART APEX II'
_diffrn_measurement_method        \w
_diffrn_detector_area_resol_mean  ? 
_diffrn_standards_number          0
_diffrn_standards_interval_count  ? 
_diffrn_standards_interval_time   0
_diffrn_standards_decay_%         0
_diffrn_reflns_number             25637 
_diffrn_reflns_av_R_equivalents   0.0448 
_diffrn_reflns_av_sigmaI/netI     0.0389 
_diffrn_reflns_limit_h_min        -13 
_diffrn_reflns_limit_h_max        13 
_diffrn_reflns_limit_k_min        -18 
_diffrn_reflns_limit_k_max        18 
_diffrn_reflns_limit_l_min        -22 
_diffrn_reflns_limit_l_max        22 
_diffrn_reflns_theta_min          2.31 
_diffrn_reflns_theta_max          27.00 
_reflns_number_total              5895 
_reflns_number_gt                 4872 
_reflns_threshold_expression      I>2\s(I) 
 
_computing_data_collection        '<i>APEX2</i> (Bruker, 2008)'
_computing_cell_refinement        'SAINT (Bruker, 2008)'
_computing_data_reduction         'SAINT (Bruker, 2008)'
_computing_structure_solution     'SHELXTL (Sheldrick, 2008)' 
_computing_structure_refinement   'SHELXTL (Sheldrick, 2008)'
_computing_molecular_graphics     'SHELXTL (Sheldrick, 2008)'
_computing_publication_material   'SHELXTL (Sheldrick, 2008)'
 
_refine_special_details 
; 
 Refinement of F^2^ against ALL reflections.  The weighted R-factor wR and 
 goodness of fit S are based on F^2^, conventional R-factors R are based 
 on F, with F set to zero for negative F^2^. The threshold expression of 
 F^2^ > 2sigma(F^2^) is used only for calculating R-factors(gt) etc. and is 
 not relevant to the choice of reflections for refinement.  R-factors based 
 on F^2^ are statistically about twice as large as those based on F, and R- 
 factors based on ALL data will be even larger. 
; 
 
_refine_ls_structure_factor_coef  Fsqd  
_refine_ls_matrix_type            full 
_refine_ls_weighting_scheme       calc  
_refine_ls_weighting_details 
 'calc w=1/[\s^2^(Fo^2^)+(0.0298P)^2^+0.7756P] where P=(Fo^2^+2Fc^2^)/3' 
_atom_sites_solution_primary      direct 
_atom_sites_solution_secondary    difmap 
_atom_sites_solution_hydrogens    mixed
_refine_ls_hydrogen_treatment     mixed 
_refine_ls_extinction_method      none 
_refine_ls_extinction_coef        ? 
_refine_ls_number_reflns          5895 
_refine_ls_number_parameters      360 
_refine_ls_number_restraints      0 
_refine_ls_R_factor_all           0.0419 
_refine_ls_R_factor_gt            0.0303 
_refine_ls_wR_factor_ref          0.0735 
_refine_ls_wR_factor_gt           0.0696 
_refine_ls_goodness_of_fit_ref    1.055 
_refine_ls_restrained_S_all       1.055 
_refine_ls_shift/su_max           0.001 
_refine_ls_shift/su_mean          0.000 
 
loop_ 
 _atom_site_label 
 _atom_site_type_symbol 
 _atom_site_fract_x 
 _atom_site_fract_y 
 _atom_site_fract_z 
 _atom_site_U_iso_or_equiv 
 _atom_site_adp_type 
 _atom_site_occupancy 
 _atom_site_symmetry_multiplicity 
 _atom_site_calc_flag 
 _atom_site_refinement_flags 
 _atom_site_disorder_assembly 
 _atom_site_disorder_group 
S1 S 0.28746(6) 0.48785(3) 0.73733(3) 0.03361(14) Uani 1 1 d . . . 
Br1 Br 0.652971(19) 0.213783(13) 0.419263(11) 0.02690(7) Uani 1 1 d . . . 
N1 N 0.46731(15) 0.44599(11) 0.60353(8) 0.0212(3) Uani 1 1 d . . . 
N2 N 0.11636(16) 0.26631(11) 0.36477(9) 0.0229(4) Uani 1 1 d . . . 
H2 H 0.177(2) 0.2308(15) 0.3498(12) 0.028(6) Uiso 1 1 d . . . 
O1 O 0.37041(13) 0.24111(8) 0.34537(7) 0.0218(3) Uani 1 1 d . . . 
O2 O 0.15168(12) 0.54638(9) 0.42673(7) 0.0225(3) Uani 1 1 d . . . 
O3 O 0.09910(13) 0.57892(9) 0.54112(8) 0.0281(3) Uani 1 1 d . . . 
C1 C 0.35620(17) 0.49550(12) 0.59948(10) 0.0202(4) Uani 1 1 d . . . 
C2 C 0.27569(17) 0.47780(12) 0.53109(10) 0.0190(4) Uani 1 1 d . . . 
C3 C 0.34116(17) 0.41049(12) 0.49181(10) 0.0180(4) Uani 1 1 d . . . 
C4 C 0.30848(17) 0.35652(12) 0.42605(10) 0.0190(4) Uani 1 1 d . . . 
C5 C 0.40083(18) 0.29503(12) 0.40566(10) 0.0188(4) Uani 1 1 d . . . 
C6 C 0.52490(18) 0.28983(12) 0.45171(10) 0.0195(4) Uani 1 1 d . . . 
C7 C 0.55608(17) 0.33669(12) 0.51873(10) 0.0198(4) Uani 1 1 d . . . 
H7 H 0.6380 0.3295 0.5502 0.024 Uiso 1 1 calc R . . 
C8 C 0.46177(17) 0.39507(12) 0.53811(10) 0.0190(4) Uani 1 1 d . . . 
C9 C 0.57686(19) 0.44422(14) 0.66594(11) 0.0274(4) Uani 1 1 d . . . 
H9A H 0.5528 0.4762 0.7098 0.041 Uiso 1 1 calc R . . 
H9B H 0.6520 0.4743 0.6500 0.041 Uiso 1 1 calc R . . 
H9C H 0.5991 0.3810 0.6798 0.041 Uiso 1 1 calc R . . 
C10 C 0.33581(19) 0.55767(13) 0.66235(10) 0.0229(4) Uani 1 1 d . . . 
H10A H 0.2671 0.6026 0.6443 0.028 Uiso 1 1 calc R . . 
H10B H 0.4171 0.5909 0.6814 0.028 Uiso 1 1 calc R . . 
C11 C 0.16568(18) 0.53755(12) 0.50286(11) 0.0206(4) Uani 1 1 d . . . 
C12 C 0.17695(18) 0.35925(12) 0.37676(11) 0.0228(4) Uani 1 1 d . . . 
H12A H 0.1186 0.3992 0.4006 0.027 Uiso 1 1 calc R . . 
H12B H 0.1861 0.3858 0.3270 0.027 Uiso 1 1 calc R . . 
C13 C 0.24030(18) 0.56948(13) 0.80025(10) 0.0225(4) Uani 1 1 d . . . 
C14 C 0.27995(19) 0.65958(13) 0.80330(11) 0.0273(4) Uani 1 1 d . . . 
H14A H 0.3355 0.6812 0.7699 0.033 Uiso 1 1 calc R . . 
C15 C 0.2381(2) 0.71813(15) 0.85544(12) 0.0322(5) Uani 1 1 d . . . 
H15A H 0.2644 0.7801 0.8572 0.039 Uiso 1 1 calc R . . 
C16 C 0.1585(2) 0.68680(16) 0.90476(12) 0.0346(5) Uani 1 1 d . . . 
H16A H 0.1300 0.7271 0.9403 0.042 Uiso 1 1 calc R . . 
C17 C 0.1203(2) 0.59681(16) 0.90235(12) 0.0340(5) Uani 1 1 d . . . 
H17A H 0.0668 0.5751 0.9369 0.041 Uiso 1 1 calc R . . 
C18 C 0.1595(2) 0.53827(14) 0.85005(11) 0.0281(4) Uani 1 1 d . . . 
H18A H 0.1316 0.4767 0.8479 0.034 Uiso 1 1 calc R . . 
C19 C 0.0478(2) 0.60530(14) 0.39058(12) 0.0295(5) Uani 1 1 d . . . 
H19A H 0.0627 0.6687 0.4086 0.035 Uiso 1 1 calc R . . 
H19B H -0.0371 0.5846 0.4024 0.035 Uiso 1 1 calc R . . 
C20 C 0.0495(2) 0.59987(16) 0.30702(12) 0.0383(5) Uani 1 1 d . . . 
H20A H -0.0190 0.6389 0.2802 0.057 Uiso 1 1 calc R . . 
H20B H 0.0344 0.5369 0.2900 0.057 Uiso 1 1 calc R . . 
H20C H 0.1343 0.6202 0.2962 0.057 Uiso 1 1 calc R . . 
C21 C 0.0024(2) 0.26851(15) 0.30343(13) 0.0347(5) Uani 1 1 d . . . 
H21A H -0.0340 0.2072 0.2955 0.052 Uiso 1 1 calc R . . 
H21B H 0.0295 0.2903 0.2565 0.052 Uiso 1 1 calc R . . 
H21C H -0.0637 0.3096 0.3178 0.052 Uiso 1 1 calc R . . 
C22 C 0.0803(2) 0.22974(15) 0.43618(13) 0.0363(5) Uani 1 1 d . . . 
H22A H 0.0443 0.1684 0.4271 0.055 Uiso 1 1 calc R . . 
H22B H 0.0152 0.2695 0.4533 0.055 Uiso 1 1 calc R . . 
H22C H 0.1578 0.2272 0.4752 0.055 Uiso 1 1 calc R . . 
O21 O 0.11498(14) 0.57669(10) 0.10282(9) 0.0311(3) Uani 1 1 d . . . 
O22 O 0.32051(15) 0.57569(10) 0.16006(9) 0.0410(4) Uani 1 1 d . . . 
O23 O 0.41767(15) 0.31934(11) 0.22701(9) 0.0362(4) Uani 1 1 d . A . 
O24 O 0.2149(15) 0.364(2) 0.2005(9) 0.050(5) Uani 0.44(5) 1 d P A 1 
O25 O 0.2096(9) 0.318(2) 0.1816(9) 0.061(5) Uani 0.56(5) 1 d P A 2 
C23 C 0.2321(2) 0.54100(13) 0.11759(11) 0.0259(4) Uani 1 1 d . . . 
C24 C 0.2471(2) 0.45613(14) 0.07303(12) 0.0341(5) Uani 1 1 d . . . 
H24A H 0.2654 0.4733 0.0222 0.041 Uiso 1 1 calc R . . 
H24B H 0.1642 0.4219 0.0661 0.041 Uiso 1 1 calc R . . 
C25 C 0.3554(2) 0.39493(14) 0.11132(12) 0.0315(5) Uani 1 1 d . A . 
H25A H 0.3750 0.3484 0.0747 0.038 Uiso 1 1 calc R . . 
H25B H 0.4348 0.4317 0.1265 0.038 Uiso 1 1 calc R . . 
C26 C 0.3198(2) 0.34847(15) 0.17992(12) 0.0312(5) Uani 1 1 d . . . 
H1 H 0.117(2) 0.6242(19) 0.1239(15) 0.049(8) Uiso 1 1 d . . . 
H3 H 0.397(3) 0.2918(17) 0.2621(15) 0.048(8) Uiso 1 1 d . . . 
 
loop_ 
 _atom_site_aniso_label 
 _atom_site_aniso_U_11 
 _atom_site_aniso_U_22 
 _atom_site_aniso_U_33 
 _atom_site_aniso_U_23 
 _atom_site_aniso_U_13 
 _atom_site_aniso_U_12 
S1 0.0554(4) 0.0218(3) 0.0292(3) -0.0031(2) 0.0238(3) -0.0012(2) 
Br1 0.02694(11) 0.02309(11) 0.03207(12) -0.00058(8) 0.00898(8) 0.00608(8) 
N1 0.0222(8) 0.0260(8) 0.0152(8) -0.0027(6) 0.0024(6) -0.0015(7) 
N2 0.0221(8) 0.0206(8) 0.0250(9) -0.0041(7) 0.0008(7) 0.0008(7) 
O1 0.0304(7) 0.0178(6) 0.0171(6) -0.0021(5) 0.0033(6) 0.0005(5) 
O2 0.0239(7) 0.0220(7) 0.0214(7) 0.0013(5) 0.0031(5) 0.0048(5) 
O3 0.0273(7) 0.0291(8) 0.0291(8) -0.0060(6) 0.0079(6) 0.0049(6) 
C1 0.0235(10) 0.0200(9) 0.0184(9) 0.0003(7) 0.0070(8) -0.0032(7) 
C2 0.0204(9) 0.0178(9) 0.0196(9) -0.0009(7) 0.0056(7) -0.0027(7) 
C3 0.0198(9) 0.0165(9) 0.0183(9) 0.0020(7) 0.0049(7) -0.0010(7) 
C4 0.0221(9) 0.0161(9) 0.0187(9) 0.0012(7) 0.0028(7) 0.0000(7) 
C5 0.0251(9) 0.0149(9) 0.0170(9) 0.0021(7) 0.0045(7) -0.0015(7) 
C6 0.0214(9) 0.0172(9) 0.0218(9) 0.0016(7) 0.0095(7) 0.0017(7) 
C7 0.0179(9) 0.0211(9) 0.0204(9) 0.0042(7) 0.0028(7) -0.0007(7) 
C8 0.0210(9) 0.0204(9) 0.0160(9) 0.0005(7) 0.0041(7) -0.0035(7) 
C9 0.0258(10) 0.0355(11) 0.0195(10) -0.0019(8) -0.0006(8) -0.0010(9) 
C10 0.0296(10) 0.0226(10) 0.0182(9) -0.0024(8) 0.0088(8) -0.0032(8) 
C11 0.0224(9) 0.0165(9) 0.0230(10) -0.0025(7) 0.0045(8) -0.0041(7) 
C12 0.0258(10) 0.0172(9) 0.0238(10) -0.0023(7) -0.0011(8) 0.0007(8) 
C13 0.0244(10) 0.0252(10) 0.0180(9) -0.0018(8) 0.0037(8) 0.0031(8) 
C14 0.0253(10) 0.0301(11) 0.0274(11) -0.0051(8) 0.0074(8) -0.0024(8) 
C15 0.0304(11) 0.0299(11) 0.0343(12) -0.0103(9) -0.0009(9) 0.0005(9) 
C16 0.0311(12) 0.0456(13) 0.0273(11) -0.0136(10) 0.0052(9) 0.0097(10) 
C17 0.0316(11) 0.0484(14) 0.0247(11) -0.0003(10) 0.0124(9) 0.0051(10) 
C18 0.0331(11) 0.0293(11) 0.0230(10) -0.0001(8) 0.0079(9) -0.0025(9) 
C19 0.0266(11) 0.0231(10) 0.0379(12) 0.0073(9) 0.0027(9) 0.0063(8) 
C20 0.0383(13) 0.0409(13) 0.0337(12) 0.0117(10) -0.0006(10) 0.0063(10) 
C21 0.0255(11) 0.0401(13) 0.0342(12) -0.0051(10) -0.0086(9) -0.0026(9) 
C22 0.0394(13) 0.0343(12) 0.0351(12) 0.0049(10) 0.0052(10) -0.0058(10) 
O21 0.0331(8) 0.0208(8) 0.0374(9) -0.0052(7) -0.0003(7) 0.0014(6) 
O22 0.0386(9) 0.0329(9) 0.0454(10) -0.0060(7) -0.0127(8) 0.0034(7) 
O23 0.0304(8) 0.0489(10) 0.0297(8) 0.0158(8) 0.0063(7) 0.0018(7) 
O24 0.036(3) 0.073(10) 0.045(4) 0.026(5) 0.016(3) 0.017(4) 
O25 0.029(2) 0.094(11) 0.057(4) 0.033(6) -0.006(2) -0.013(4) 
C23 0.0360(12) 0.0214(10) 0.0194(10) 0.0055(8) 0.0017(9) 0.0001(8) 
C24 0.0477(14) 0.0286(11) 0.0248(11) 0.0004(9) 0.0021(10) 0.0094(10) 
C25 0.0390(12) 0.0297(11) 0.0266(11) 0.0035(9) 0.0076(9) 0.0095(9) 
C26 0.0295(11) 0.0345(12) 0.0293(11) 0.0071(9) 0.0044(9) 0.0027(9) 
 
_geom_special_details 
; 
 All esds (except the esd in the dihedral angle between two l.s. planes) 
 are estimated using the full covariance matrix.  The cell esds are taken 
 into account individually in the estimation of esds in distances, angles 
 and torsion angles; correlations between esds in cell parameters are only 
 used when they are defined by crystal symmetry.  An approximate (isotropic) 
 treatment of cell esds is used for estimating esds involving l.s. planes. 
; 
 
loop_ 
 _geom_bond_atom_site_label_1 
 _geom_bond_atom_site_label_2 
 _geom_bond_distance 
 _geom_bond_site_symmetry_2 
 _geom_bond_publ_flag 
S1 C13 1.7669(19) . ? 
S1 C10 1.8212(19) . ? 
Br1 C6 1.9006(18) . ? 
N1 C1 1.360(2) . ? 
N1 C8 1.382(2) . ? 
N1 C9 1.464(2) . ? 
N2 C21 1.483(2) . ? 
N2 C22 1.487(3) . ? 
N2 C12 1.506(2) . ? 
N2 H2 0.90(2) . ? 
O1 C5 1.335(2) . ? 
O2 C11 1.351(2) . ? 
O2 C19 1.455(2) . ? 
O3 C11 1.212(2) . ? 
C1 C2 1.392(3) . ? 
C1 C10 1.490(2) . ? 
C2 C3 1.446(2) . ? 
C2 C11 1.468(3) . ? 
C3 C8 1.409(2) . ? 
C3 C4 1.414(2) . ? 
C4 C5 1.410(3) . ? 
C4 C12 1.507(3) . ? 
C5 C6 1.420(3) . ? 
C6 C7 1.375(3) . ? 
C7 C8 1.389(2) . ? 
C7 H7 0.9500 . ? 
C9 H9A 0.9800 . ? 
C9 H9B 0.9800 . ? 
C9 H9C 0.9800 . ? 
C10 H10A 0.9900 . ? 
C10 H10B 0.9900 . ? 
C12 H12A 0.9900 . ? 
C12 H12B 0.9900 . ? 
C13 C14 1.386(3) . ? 
C13 C18 1.396(3) . ? 
C14 C15 1.389(3) . ? 
C14 H14A 0.9500 . ? 
C15 C16 1.382(3) . ? 
C15 H15A 0.9500 . ? 
C16 C17 1.381(3) . ? 
C16 H16A 0.9500 . ? 
C17 C18 1.379(3) . ? 
C17 H17A 0.9500 . ? 
C18 H18A 0.9500 . ? 
C19 C20 1.498(3) . ? 
C19 H19A 0.9900 . ? 
C19 H19B 0.9900 . ? 
C20 H20A 0.9800 . ? 
C20 H20B 0.9800 . ? 
C20 H20C 0.9800 . ? 
C21 H21A 0.9800 . ? 
C21 H21B 0.9800 . ? 
C21 H21C 0.9800 . ? 
C22 H22A 0.9800 . ? 
C22 H22B 0.9800 . ? 
C22 H22C 0.9800 . ? 
O21 C23 1.315(2) . ? 
O21 H1 0.79(3) . ? 
O22 C23 1.210(2) . ? 
O23 C26 1.288(2) . ? 
O23 H3 0.80(3) . ? 
O24 C26 1.230(7) . ? 
O25 C26 1.240(6) . ? 
C23 C24 1.502(3) . ? 
C24 C25 1.518(3) . ? 
C24 H24A 0.9900 . ? 
C24 H24B 0.9900 . ? 
C25 C26 1.500(3) . ? 
C25 H25A 0.9900 . ? 
C25 H25B 0.9900 . ? 
 
loop_ 
 _geom_angle_atom_site_label_1 
 _geom_angle_atom_site_label_2 
 _geom_angle_atom_site_label_3 
 _geom_angle 
 _geom_angle_site_symmetry_1 
 _geom_angle_site_symmetry_3 
 _geom_angle_publ_flag 
C13 S1 C10 102.84(9) . . ? 
C1 N1 C8 108.91(15) . . ? 
C1 N1 C9 127.18(16) . . ? 
C8 N1 C9 123.90(16) . . ? 
C21 N2 C22 111.13(17) . . ? 
C21 N2 C12 110.71(15) . . ? 
C22 N2 C12 111.31(16) . . ? 
C21 N2 H2 108.3(14) . . ? 
C22 N2 H2 109.5(14) . . ? 
C12 N2 H2 105.7(14) . . ? 
C11 O2 C19 117.26(14) . . ? 
N1 C1 C2 109.63(16) . . ? 
N1 C1 C10 120.70(16) . . ? 
C2 C1 C10 129.67(17) . . ? 
C1 C2 C3 106.81(15) . . ? 
C1 C2 C11 121.21(16) . . ? 
C3 C2 C11 130.21(16) . . ? 
C8 C3 C4 118.19(16) . . ? 
C8 C3 C2 105.70(15) . . ? 
C4 C3 C2 135.88(17) . . ? 
C5 C4 C3 119.38(16) . . ? 
C5 C4 C12 117.42(16) . . ? 
C3 C4 C12 123.18(16) . . ? 
O1 C5 C4 120.35(16) . . ? 
O1 C5 C6 120.89(16) . . ? 
C4 C5 C6 118.73(16) . . ? 
C7 C6 C5 123.04(17) . . ? 
C7 C6 Br1 118.70(14) . . ? 
C5 C6 Br1 118.27(13) . . ? 
C6 C7 C8 116.62(17) . . ? 
C6 C7 H7 121.7 . . ? 
C8 C7 H7 121.7 . . ? 
N1 C8 C7 127.55(17) . . ? 
N1 C8 C3 108.87(16) . . ? 
C7 C8 C3 123.58(16) . . ? 
N1 C9 H9A 109.5 . . ? 
N1 C9 H9B 109.5 . . ? 
H9A C9 H9B 109.5 . . ? 
N1 C9 H9C 109.5 . . ? 
H9A C9 H9C 109.5 . . ? 
H9B C9 H9C 109.5 . . ? 
C1 C10 S1 107.33(13) . . ? 
C1 C10 H10A 110.2 . . ? 
S1 C10 H10A 110.2 . . ? 
C1 C10 H10B 110.2 . . ? 
S1 C10 H10B 110.2 . . ? 
H10A C10 H10B 108.5 . . ? 
O3 C11 O2 122.65(17) . . ? 
O3 C11 C2 126.29(17) . . ? 
O2 C11 C2 110.92(15) . . ? 
N2 C12 C4 112.36(14) . . ? 
N2 C12 H12A 109.1 . . ? 
C4 C12 H12A 109.1 . . ? 
N2 C12 H12B 109.1 . . ? 
C4 C12 H12B 109.1 . . ? 
H12A C12 H12B 107.9 . . ? 
C14 C13 C18 119.69(18) . . ? 
C14 C13 S1 124.27(15) . . ? 
C18 C13 S1 116.03(15) . . ? 
C13 C14 C15 119.71(19) . . ? 
C13 C14 H14A 120.1 . . ? 
C15 C14 H14A 120.1 . . ? 
C16 C15 C14 120.3(2) . . ? 
C16 C15 H15A 119.8 . . ? 
C14 C15 H15A 119.8 . . ? 
C17 C16 C15 119.9(2) . . ? 
C17 C16 H16A 120.0 . . ? 
C15 C16 H16A 120.0 . . ? 
C18 C17 C16 120.3(2) . . ? 
C18 C17 H17A 119.9 . . ? 
C16 C17 H17A 119.9 . . ? 
C17 C18 C13 120.01(19) . . ? 
C17 C18 H18A 120.0 . . ? 
C13 C18 H18A 120.0 . . ? 
O2 C19 C20 106.57(16) . . ? 
O2 C19 H19A 110.4 . . ? 
C20 C19 H19A 110.4 . . ? 
O2 C19 H19B 110.4 . . ? 
C20 C19 H19B 110.4 . . ? 
H19A C19 H19B 108.6 . . ? 
C19 C20 H20A 109.5 . . ? 
C19 C20 H20B 109.5 . . ? 
H20A C20 H20B 109.5 . . ? 
C19 C20 H20C 109.5 . . ? 
H20A C20 H20C 109.5 . . ? 
H20B C20 H20C 109.5 . . ? 
N2 C21 H21A 109.5 . . ? 
N2 C21 H21B 109.5 . . ? 
H21A C21 H21B 109.5 . . ? 
N2 C21 H21C 109.5 . . ? 
H21A C21 H21C 109.5 . . ? 
H21B C21 H21C 109.5 . . ? 
N2 C22 H22A 109.5 . . ? 
N2 C22 H22B 109.5 . . ? 
H22A C22 H22B 109.5 . . ? 
N2 C22 H22C 109.5 . . ? 
H22A C22 H22C 109.5 . . ? 
H22B C22 H22C 109.5 . . ? 
C23 O21 H1 107.4(19) . . ? 
C26 O23 H3 113.6(19) . . ? 
O22 C23 O21 123.19(19) . . ? 
O22 C23 C24 123.36(19) . . ? 
O21 C23 C24 113.36(18) . . ? 
C23 C24 C25 112.72(18) . . ? 
C23 C24 H24A 109.0 . . ? 
C25 C24 H24A 109.0 . . ? 
C23 C24 H24B 109.0 . . ? 
C25 C24 H24B 109.0 . . ? 
H24A C24 H24B 107.8 . . ? 
C26 C25 C24 112.09(18) . . ? 
C26 C25 H25A 109.2 . . ? 
C24 C25 H25A 109.2 . . ? 
C26 C25 H25B 109.2 . . ? 
C24 C25 H25B 109.2 . . ? 
H25A C25 H25B 107.9 . . ? 
O24 C26 O23 121.1(5) . . ? 
O25 C26 O23 120.2(5) . . ? 
O24 C26 C25 120.2(5) . . ? 
O25 C26 C25 122.5(4) . . ? 
O23 C26 C25 114.38(18) . . ? 
 
loop_ 
 _geom_torsion_atom_site_label_1 
 _geom_torsion_atom_site_label_2 
 _geom_torsion_atom_site_label_3 
 _geom_torsion_atom_site_label_4 
 _geom_torsion 
 _geom_torsion_site_symmetry_1 
 _geom_torsion_site_symmetry_2 
 _geom_torsion_site_symmetry_3 
 _geom_torsion_site_symmetry_4 
 _geom_torsion_publ_flag 
C8 N1 C1 C2 0.0(2) . . . . ? 
C9 N1 C1 C2 -179.59(17) . . . . ? 
C8 N1 C1 C10 -179.50(15) . . . . ? 
C9 N1 C1 C10 0.9(3) . . . . ? 
N1 C1 C2 C3 1.8(2) . . . . ? 
C10 C1 C2 C3 -178.72(17) . . . . ? 
N1 C1 C2 C11 -164.45(16) . . . . ? 
C10 C1 C2 C11 15.0(3) . . . . ? 
C1 C2 C3 C8 -2.90(19) . . . . ? 
C11 C2 C3 C8 161.70(18) . . . . ? 
C1 C2 C3 C4 171.2(2) . . . . ? 
C11 C2 C3 C4 -24.2(3) . . . . ? 
C8 C3 C4 C5 -5.2(2) . . . . ? 
C2 C3 C4 C5 -178.78(19) . . . . ? 
C8 C3 C4 C12 173.07(16) . . . . ? 
C2 C3 C4 C12 -0.5(3) . . . . ? 
C3 C4 C5 O1 177.57(16) . . . . ? 
C12 C4 C5 O1 -0.8(2) . . . . ? 
C3 C4 C5 C6 -0.6(3) . . . . ? 
C12 C4 C5 C6 -178.98(16) . . . . ? 
O1 C5 C6 C7 -172.80(16) . . . . ? 
C4 C5 C6 C7 5.3(3) . . . . ? 
O1 C5 C6 Br1 6.7(2) . . . . ? 
C4 C5 C6 Br1 -175.13(13) . . . . ? 
C5 C6 C7 C8 -3.8(3) . . . . ? 
Br1 C6 C7 C8 176.70(13) . . . . ? 
C1 N1 C8 C7 178.67(17) . . . . ? 
C9 N1 C8 C7 -1.7(3) . . . . ? 
C1 N1 C8 C3 -1.9(2) . . . . ? 
C9 N1 C8 C3 177.70(16) . . . . ? 
C6 C7 C8 N1 176.77(17) . . . . ? 
C6 C7 C8 C3 -2.6(3) . . . . ? 
C4 C3 C8 N1 -172.38(15) . . . . ? 
C2 C3 C8 N1 2.96(19) . . . . ? 
C4 C3 C8 C7 7.1(3) . . . . ? 
C2 C3 C8 C7 -177.60(16) . . . . ? 
N1 C1 C10 S1 -78.71(19) . . . . ? 
C2 C1 C10 S1 101.9(2) . . . . ? 
C13 S1 C10 C1 -170.53(13) . . . . ? 
C19 O2 C11 O3 -2.8(3) . . . . ? 
C19 O2 C11 C2 -178.78(15) . . . . ? 
C1 C2 C11 O3 -33.2(3) . . . . ? 
C3 C2 C11 O3 164.03(18) . . . . ? 
C1 C2 C11 O2 142.55(17) . . . . ? 
C3 C2 C11 O2 -20.2(3) . . . . ? 
C21 N2 C12 C4 -167.63(16) . . . . ? 
C22 N2 C12 C4 68.2(2) . . . . ? 
C5 C4 C12 N2 51.9(2) . . . . ? 
C3 C4 C12 N2 -126.40(18) . . . . ? 
C10 S1 C13 C14 -21.32(19) . . . . ? 
C10 S1 C13 C18 159.75(15) . . . . ? 
C18 C13 C14 C15 -0.5(3) . . . . ? 
S1 C13 C14 C15 -179.43(16) . . . . ? 
C13 C14 C15 C16 0.7(3) . . . . ? 
C14 C15 C16 C17 0.1(3) . . . . ? 
C15 C16 C17 C18 -1.1(3) . . . . ? 
C16 C17 C18 C13 1.3(3) . . . . ? 
C14 C13 C18 C17 -0.5(3) . . . . ? 
S1 C13 C18 C17 178.53(16) . . . . ? 
C11 O2 C19 C20 -177.48(16) . . . . ? 
O22 C23 C24 C25 27.6(3) . . . . ? 
O21 C23 C24 C25 -155.83(18) . . . . ? 
C23 C24 C25 C26 72.3(2) . . . . ? 
C24 C25 C26 O24 -2.4(19) . . . . ? 
C24 C25 C26 O25 40.0(19) . . . . ? 
C24 C25 C26 O23 -159.55(19) . . . . ? 
 
loop_ 
 _geom_hbond_atom_site_label_D 
 _geom_hbond_atom_site_label_H 
 _geom_hbond_atom_site_label_A 
 _geom_hbond_distance_DH 
 _geom_hbond_distance_HA 
 _geom_hbond_distance_DA 
 _geom_hbond_angle_DHA 
 _geom_hbond_site_symmetry_A 
N2 H2 O1  0.90(2) 2.03(2) 2.748(2) 136.2(19) . 
O23 H3 O1  0.80(3) 1.73(3) 2.524(2) 172(3) . 
O21 H1 O1  0.79(3) 1.80(3) 2.585(2) 169(3) 2 
 
_diffrn_measured_fraction_theta_max    0.999 
_diffrn_reflns_theta_full              27.00 
_diffrn_measured_fraction_theta_full   0.999 
_refine_diff_density_max    0.342 
_refine_diff_density_min   -0.290 
_refine_diff_density_rms    0.056 
