# Supplementary material
Source: MDPI journal article supplement (https://www.mdpi.com/2073-4352/5/4/650)
Supplement: s1 [file s1 › 1433017.cif]

 
data_a 

_iucr_refine_instructions_details
;
TITL a in P2(1)/n
CELL  0.71073  15.9728  14.0080  22.8933   90.000  109.716   90.000
ZERR    4.000   0.0012   0.0010   0.0017    0.000    0.001    0.000
LATT  1
SYMM 1/2-X, 1/2+Y, 1/2-Z
SFAC C H N O S BR
UNIT 192 216 16 40 8 8
TEMP -90
SIZE .25 .20 .20
 
HTAB O11 O2
HTAB N12 O1
HTAB O21 O3
HTAB N22 O4
 
L.S. 10
BOND $H
ACTA
CONF
FMAP 2
PLAN 8
OMIT -2 56
OMIT 0 1 1
OMIT 1 0 1
OMIT 1 1 0
OMIT -1 0 1
 
WGHT    0.034900    2.114000
FVAR       0.06081
S1    5    0.171111    1.241718    0.436123    11.00000    0.02361    0.02790 =
         0.02650    0.00761    0.00376    0.00012
BR1   6    0.173727    0.664020    0.561679    11.00000    0.06441    0.02024 =
         0.04761    0.00043    0.01529    0.00577
N11   3    0.116716    1.013653    0.467675    11.00000    0.02578    0.02602 =
         0.02070    0.00182    0.00818    0.00045
N12   3    0.225291    0.988141    0.727825    11.00000    0.02510    0.02257 =
         0.02235    0.00142    0.01002    0.00539
H12   2    0.260091    0.942866    0.724461    11.00000    0.03238
O11   4    0.167949    0.786130    0.671574    11.00000    0.02603    0.02827 =
         0.03352    0.01166    0.01050    0.00191
H11   2    0.223191    0.764733    0.684940    11.00000    0.06798
O12   4    0.094509    1.255210    0.566231    11.00000    0.04548    0.02034 =
         0.03637    0.00172    0.02292    0.00392
O13   4    0.050702    1.157118    0.627226    11.00000    0.04798    0.02999 =
         0.03520    0.00562    0.02519    0.00711
C11   1    0.099270    1.099881    0.488424    11.00000    0.01853    0.02459 =
         0.02557    0.00258    0.00760   -0.00012
C12   1    0.101430    1.091265    0.549408    11.00000    0.02046    0.02315 =
         0.02413    0.00317    0.00857    0.00153
C13   1    0.121277    0.992242    0.567298    11.00000    0.01755    0.02189 =
         0.02296    0.00034    0.00676    0.00070
C14   1    0.135769    0.936199    0.621475    11.00000    0.01698    0.02391 =
         0.02376    0.00236    0.00630   -0.00060
C15   1    0.155127    0.838900    0.619654    11.00000    0.01561    0.02561 =
         0.02856    0.00559    0.00643   -0.00164
C16   1    0.157447    0.797391    0.564262    11.00000    0.02454    0.01782 =
         0.03508   -0.00051    0.00801    0.00050
C17   1    0.146191    0.849907    0.511361    11.00000    0.02369    0.02556 =
         0.02803   -0.00319    0.00746    0.00058
AFIX  43
H17   2    0.149374    0.821255    0.474557    11.00000   -1.20000
AFIX   0
C18   1    0.129938    0.946923    0.514415    11.00000    0.01958    0.02471 =
         0.02402    0.00181    0.00662    0.00023
C19   1    0.120705    0.990357    0.406462    11.00000    0.03269    0.03304 =
         0.02236   -0.00074    0.01000   -0.00208
AFIX 137
H19A  2    0.110269    1.048222    0.380944    11.00000   -1.50000
H19B  2    0.075003    0.942823    0.386458    11.00000   -1.50000
H19C  2    0.179518    0.964399    0.410925    11.00000   -1.50000
AFIX   0
C20   1    0.073379    1.182708    0.445086    11.00000    0.02239    0.02799 =
         0.02435    0.00585    0.00693    0.00125
AFIX  23
H20A  2    0.039846    1.229342    0.461084    11.00000   -1.20000
H20B  2    0.033815    1.160352    0.404030    11.00000   -1.20000
AFIX   0
C21   1    0.079943    1.167837    0.585272    11.00000    0.02527    0.02302 =
         0.02622    0.00428    0.00816    0.00371
C22   1    0.132861    0.971953    0.682861    11.00000    0.02101    0.02897 =
         0.02542    0.00575    0.01041    0.00293
AFIX  23
H22A  2    0.098992    1.032506    0.676435    11.00000   -1.20000
H22B  2    0.101814    0.924686    0.700408    11.00000   -1.20000
AFIX   0
C23   1    0.113056    1.328153    0.380042    11.00000    0.02504    0.02560 =
         0.02577    0.00715    0.01013    0.00358
C24   1    0.058250    1.300293    0.321405    11.00000    0.04021    0.02957 =
         0.02906    0.00428    0.00963    0.00455
AFIX  43
H24   2    0.053380    1.234677    0.310269    11.00000   -1.20000
AFIX   0
C25   1    0.010598    1.368122    0.279058    11.00000    0.03743    0.04691 =
         0.02910    0.01095    0.00542    0.00807
AFIX  43
H25   2   -0.027806    1.348604    0.239308    11.00000   -1.20000
AFIX   0
C26   1    0.018627    1.463496    0.294286    11.00000    0.03611    0.04206 =
         0.04480    0.02204    0.01796    0.01316
AFIX  43
H26   2   -0.014439    1.509669    0.265240    11.00000   -1.20000
AFIX   0
C27   1    0.074902    1.491913    0.351925    11.00000    0.04596    0.02444 =
         0.05611    0.00718    0.02766    0.00642
AFIX  43
H27   2    0.081734    1.557901    0.361994    11.00000   -1.20000
AFIX   0
C28   1    0.121711    1.424448    0.395397    11.00000    0.03465    0.02861 =
         0.03503    0.00076    0.01567   -0.00013
AFIX  43
H28   2    0.159343    1.444188    0.435322    11.00000   -1.20000
AFIX   0
C29   1    0.066063    1.334637    0.595660    11.00000    0.05614    0.02409 =
         0.04500   -0.00231    0.02685    0.00412
AFIX  23
H29A  2    0.102990    1.338517    0.640076    11.00000   -1.20000
H29B  2    0.003141    1.326482    0.592562    11.00000   -1.20000
AFIX   0
C30   1    0.076799    1.423015    0.562343    11.00000    0.05424    0.02509 =
         0.04445    0.00180    0.01663    0.00726
AFIX 137
H30A  2    0.057934    1.478575    0.580775    11.00000   -1.50000
H30B  2    0.040142    1.418085    0.518449    11.00000   -1.50000
H30C  2    0.139365    1.430354    0.565951    11.00000   -1.50000
AFIX   0
C31   1    0.226394    0.991086    0.793057    11.00000    0.04360    0.04116 =
         0.02278    0.00183    0.01211    0.00774
AFIX 137
H31A  2    0.287611    0.999836    0.821145    11.00000   -1.50000
H31B  2    0.202704    0.931013    0.802949    11.00000   -1.50000
H31C  2    0.189592    1.044348    0.798035    11.00000   -1.50000
AFIX   0
C32   1    0.264343    1.077135    0.712647    11.00000    0.02960    0.02613 =
         0.03983   -0.00088    0.01387   -0.00172
AFIX 137
H32A  2    0.326283    1.083007    0.740052    11.00000   -1.50000
H32B  2    0.230286    1.132308    0.718501    11.00000   -1.50000
H32C  2    0.262203    1.074753    0.669384    11.00000   -1.50000
AFIX   0
S2    5    0.845542    0.292869    1.103898    11.00000    0.02716    0.02403 =
         0.03776    0.00337    0.01508    0.00219
BR2   6    0.800130    0.826714    0.918214    11.00000    0.06413    0.02582 =
         0.03036    0.00504    0.00992    0.00530
N21   3    0.888727    0.508858    1.049582    11.00000    0.02565    0.02424 =
         0.01658   -0.00031    0.00687   -0.00045
N22   3    0.771737    0.467639    0.788651    11.00000    0.02121    0.02501 =
         0.01817   -0.00262    0.00531    0.00322
H22   2    0.733335    0.513932    0.789079    11.00000    0.02544
O21   4    0.821787    0.679816    0.823165    11.00000    0.02352    0.04253 =
         0.02001    0.00858    0.00547    0.00016
H21   2    0.765735    0.699629    0.805787    11.00000    0.05763
O22   4    0.922592    0.244828    0.981960    11.00000    0.04160    0.02503 =
         0.03673   -0.00151    0.01754    0.00362
O23   4    0.950547    0.319818    0.904101    11.00000    0.03495    0.03744 =
         0.02876   -0.00407    0.01464    0.00483
C41   1    0.911744    0.418508    1.038761    11.00000    0.01837    0.02607 =
         0.02138    0.00076    0.00544   -0.00197
C42   1    0.905542    0.410013    0.976867    11.00000    0.01798    0.02782 =
         0.02015   -0.00149    0.00520   -0.00124
C43   1    0.878293    0.502221    0.948006    11.00000    0.01643    0.02677 =
         0.01892   -0.00211    0.00435   -0.00224
C44   1    0.859296    0.544002    0.888377    11.00000    0.01590    0.03104 =
         0.01811   -0.00179    0.00445   -0.00136
C45   1    0.835068    0.640298    0.879623    11.00000    0.01681    0.03275 =
         0.01802    0.00270    0.00360   -0.00287
C46   1    0.828845    0.695368    0.929700    11.00000    0.02372    0.02219 =
         0.02592    0.00161    0.00574    0.00011
C47   1    0.844501    0.656716    0.987759    11.00000    0.02464    0.02668 =
         0.01986   -0.00265    0.00648   -0.00256
AFIX  43
H47   2    0.839185    0.693895    1.021037    11.00000   -1.20000
AFIX   0
C48   1    0.868318    0.561326    0.995471    11.00000    0.01974    0.02537 =
         0.01743    0.00040    0.00493   -0.00265
C49   1    0.883433    0.548051    1.107250    11.00000    0.03121    0.02954 =
         0.01881   -0.00070    0.00946   -0.00008
AFIX 137
H49A  2    0.899645    0.498631    1.139432    11.00000   -1.50000
H49B  2    0.822594    0.569801    1.100583    11.00000   -1.50000
H49C  2    0.924504    0.602059    1.120486    11.00000   -1.50000
AFIX   0
C50   1    0.941816    0.348741    1.090723    11.00000    0.02344    0.02868 =
         0.02183    0.00246    0.00573   -0.00129
AFIX  23
H50A  2    0.978698    0.381798    1.128970    11.00000   -1.20000
H50B  2    0.978800    0.298901    1.080722    11.00000   -1.20000
AFIX   0
C51   1    0.928361    0.323415    0.949655    11.00000    0.01888    0.02873 =
         0.02426   -0.00336    0.00379    0.00041
C52   1    0.863647    0.492928    0.831412    11.00000    0.01847    0.03626 =
         0.01874   -0.00032    0.00584    0.00053
AFIX  23
H52A  2    0.893219    0.534407    0.809241    11.00000   -1.20000
H52B  2    0.899444    0.434007    0.844015    11.00000   -1.20000
AFIX   0
C53   1    0.878775    0.171531    1.110974    11.00000    0.02776    0.02411 =
         0.02741    0.00298    0.01211    0.00096
C54   1    0.955029    0.140464    1.157108    11.00000    0.03510    0.03235 =
         0.04386    0.00116   -0.00016    0.00254
AFIX  43
H54   2    0.991958    0.185146    1.185451    11.00000   -1.20000
AFIX   0
C55   1    0.977680    0.044726    1.162119    11.00000    0.04068    0.04065 =
         0.06454    0.01393    0.01134    0.01267
AFIX  43
H55   2    1.029967    0.023807    1.193887    11.00000   -1.20000
AFIX   0
C56   1    0.924393   -0.020227    1.121032    11.00000    0.06439    0.02478 =
         0.06251    0.00554    0.04066    0.00721
AFIX  43
H56   2    0.939323   -0.086123    1.124822    11.00000   -1.20000
AFIX   0
C57   1    0.849616    0.010512    1.074567    11.00000    0.06541    0.02975 =
         0.04295   -0.00629    0.02700   -0.01489
AFIX  43
H57   2    0.813707   -0.034213    1.045699    11.00000   -1.20000
AFIX   0
C58   1    0.826119    0.105873    1.069411    11.00000    0.04039    0.03271 =
         0.02770    0.00145    0.01027   -0.00826
AFIX  43
H58   2    0.773916    0.126379    1.037401    11.00000   -1.20000
AFIX   0
C59   1    0.949912    0.155093    0.962469    11.00000    0.04382    0.02713 =
         0.04757   -0.00388    0.01690    0.00670
AFIX  23
H59A  2    0.968797    0.110616    0.998148    11.00000   -1.20000
H59B  2    1.001491    0.166242    0.948613    11.00000   -1.20000
AFIX   0
C60   1    0.875838    0.110651    0.910606    11.00000    0.04766    0.04236 =
         0.07130   -0.02050    0.01975   -0.00329
AFIX 137
H60A  2    0.893493    0.046498    0.902228    11.00000   -1.50000
H60B  2    0.863148    0.150007    0.873224    11.00000   -1.50000
H60C  2    0.822469    0.106408    0.922479    11.00000   -1.50000
AFIX   0
C61   1    0.769012    0.459461    0.723382    11.00000    0.03388    0.04453 =
         0.01888   -0.00596    0.00603    0.00556
AFIX 137
H61A  2    0.708317    0.444193    0.696606    11.00000   -1.50000
H61B  2    0.809466    0.408651    0.720258    11.00000   -1.50000
H61C  2    0.787454    0.520140    0.710195    11.00000   -1.50000
AFIX   0
C62   1    0.739057    0.378621    0.808734    11.00000    0.03067    0.02798 =
         0.04065   -0.00126    0.01323   -0.00061
AFIX 137
H62A  2    0.676437    0.368827    0.783750    11.00000   -1.50000
H62B  2    0.744831    0.383870    0.852611    11.00000   -1.50000
H62C  2    0.774314    0.324360    0.803109    11.00000   -1.50000
AFIX   0
O1    4    0.362112    0.877953    0.728878    11.00000    0.02593    0.01911 =
         0.04256   -0.00209    0.01024    0.00249
O2    4    0.326894    0.723994    0.710205    11.00000    0.02415    0.01862 =
         0.04946    0.00385    0.00768   -0.00047
O3    4    0.662471    0.730299    0.772328    11.00000    0.02438    0.02450 =
         0.04239    0.00771    0.00554   -0.00209
O4    4    0.631347    0.575651    0.778232    11.00000    0.02408    0.02009 =
         0.04236    0.00015    0.00875    0.00314
C1    1    0.381638    0.791779    0.725117    11.00000    0.02511    0.02107 =
         0.02196    0.00340    0.00773    0.00196
C2    1    0.478338    0.769702    0.739848    11.00000    0.02226    0.02119 =
         0.03025    0.00019    0.00785   -0.00192
AFIX  43
H2    2    0.517471    0.821410    0.741291    11.00000   -1.20000
AFIX   0
C3    1    0.512494    0.683912    0.750863    11.00000    0.02260    0.02147 =
         0.02793    0.00077    0.00752   -0.00081
AFIX  43
H3    2    0.472925    0.631962    0.747560    11.00000   -1.20000
AFIX   0
C4    1    0.609533    0.661949    0.768299    11.00000    0.02440    0.02457 =
         0.01956    0.00110    0.00626    0.00144
 
HKLF 4
 
REM  a in P2(1)/n
REM R1 =  0.0317 for   8931 Fo > 4sig(Fo)  and  0.0507 for all  11638 data
REM    619 parameters refined using      0 restraints
 
END  
     
WGHT      0.0349      2.1142 
REM Highest difference peak  0.519,  deepest hole -0.494,  1-sigma level  0.054
Q1    1   0.2264  0.6762  0.5765  11.00000  0.05    0.52
Q2    1   0.8372  0.8134  0.9003  11.00000  0.05    0.45
Q3    1   0.1401  0.6606  0.5847  11.00000  0.05    0.38
Q4    1   0.7431  0.8050  0.9099  11.00000  0.05    0.37
Q5    1   0.1639  0.6225  0.5363  11.00000  0.05    0.33
Q6    1   0.8822  0.5413  1.0241  11.00000  0.05    0.32
Q7    1   0.7979  0.7588  0.9324  11.00000  0.05    0.30
Q8    1   0.8568  0.5157  0.8636  11.00000  0.05    0.30

;
 
_audit_creation_method            SHELXL-97 
_chemical_name_systematic 
; 
 ? 
; 
_chemical_name_common             ? 
_chemical_melting_point           ? 
_chemical_formula_moiety          '2(C22 H26 Br N2 O3 S), C4 H2 O4'
_chemical_formula_sum 
 'C48 H54 Br2 N4 O10 S2' 
_chemical_formula_weight          1070.89 
 
loop_ 
 _atom_type_symbol 
 _atom_type_description 
 _atom_type_scat_dispersion_real 
 _atom_type_scat_dispersion_imag 
 _atom_type_scat_source 
 'C'  'C'   0.0033   0.0016 
 'International Tables Vol C Tables 4.2.6.8 and 6.1.1.4' 
 'H'  'H'   0.0000   0.0000 
 'International Tables Vol C Tables 4.2.6.8 and 6.1.1.4' 
 'N'  'N'   0.0061   0.0033 
 'International Tables Vol C Tables 4.2.6.8 and 6.1.1.4' 
 'O'  'O'   0.0106   0.0060 
 'International Tables Vol C Tables 4.2.6.8 and 6.1.1.4' 
 'S'  'S'   0.1246   0.1234 
 'International Tables Vol C Tables 4.2.6.8 and 6.1.1.4' 
 'Br'  'Br'  -0.2901   2.4595 
 'International Tables Vol C Tables 4.2.6.8 and 6.1.1.4' 
 
_symmetry_cell_setting            monoclinic
_symmetry_space_group_name_H-M    'P 21/n'
_symmetry_space_group_name_Hall   '-P 2yn'
 
loop_ 
 _symmetry_equiv_pos_as_xyz 
 'x, y, z' 
 '-x+1/2, y+1/2, -z+1/2' 
 '-x, -y, -z' 
 'x-1/2, -y-1/2, z-1/2' 
 
_cell_length_a                    15.9728(12) 
_cell_length_b                    14.0080(10) 
_cell_length_c                    22.8933(17) 
_cell_angle_alpha                 90.00 
_cell_angle_beta                  109.716(1) 
_cell_angle_gamma                 90.00 
_cell_volume                      4822.0(6) 
_cell_formula_units_Z             4 
_cell_measurement_temperature     183(2) 
_cell_measurement_reflns_used     9895
_cell_measurement_theta_min       2.384
_cell_measurement_theta_max       27.620
 
_exptl_crystal_description        block
_exptl_crystal_colour             colourless
_exptl_crystal_size_max           0.25 
_exptl_crystal_size_mid           0.20 
_exptl_crystal_size_min           0.20 
_exptl_crystal_density_meas       ? 
_exptl_crystal_density_diffrn     1.475 
_exptl_crystal_density_method     'not measured' 
_exptl_crystal_F_000              2208 
_exptl_absorpt_coefficient_mu     1.829 
_exptl_absorpt_correction_type    multi-scan
_exptl_absorpt_correction_T_min   0.6577 
_exptl_absorpt_correction_T_max   0.7111 
_exptl_absorpt_process_details    'SADABS (Bruker, 2008)'
 
_exptl_special_details 
; 
 ? 
; 
 
_diffrn_ambient_temperature       183(2) 
_diffrn_radiation_wavelength      0.71073 
_diffrn_radiation_type            MoK\a 
_diffrn_radiation_source          'fine-focus sealed tube' 
_diffrn_radiation_monochromator   graphite 
_diffrn_measurement_device_type   'Bruker SMART APEX II'
_diffrn_measurement_method        \w
_diffrn_detector_area_resol_mean  ? 
_diffrn_standards_number          0
_diffrn_standards_interval_count  ? 
_diffrn_standards_interval_time   0
_diffrn_standards_decay_%         0
_diffrn_reflns_number             49265 
_diffrn_reflns_av_R_equivalents   0.0314 
_diffrn_reflns_av_sigmaI/netI     0.0284 
_diffrn_reflns_limit_h_min        -21 
_diffrn_reflns_limit_h_max        20 
_diffrn_reflns_limit_k_min        -18 
_diffrn_reflns_limit_k_max        18 
_diffrn_reflns_limit_l_min        -30 
_diffrn_reflns_limit_l_max        30 
_diffrn_reflns_theta_min          2.38 
_diffrn_reflns_theta_max          28.00 
_reflns_number_total              11638 
_reflns_number_gt                 8931 
_reflns_threshold_expression      I>2\s(I) 
 
_computing_data_collection        '<i>APEX2</i> (Bruker, 2008)'
_computing_cell_refinement        'SAINT (Bruker, 2008)'
_computing_data_reduction         'SAINT (Bruker, 2008)'
_computing_structure_solution     'SHELXTL (Sheldrick, 2008)' 
_computing_structure_refinement   'SHELXTL (Sheldrick, 2008)'
_computing_molecular_graphics     'SHELXTL (Sheldrick, 2008)'
_computing_publication_material   'SHELXTL (Sheldrick, 2008)'
 
_refine_special_details 
; 
 Refinement of F^2^ against ALL reflections.  The weighted R-factor wR and 
 goodness of fit S are based on F^2^, conventional R-factors R are based 
 on F, with F set to zero for negative F^2^. The threshold expression of 
 F^2^ > 2sigma(F^2^) is used only for calculating R-factors(gt) etc. and is 
 not relevant to the choice of reflections for refinement.  R-factors based 
 on F^2^ are statistically about twice as large as those based on F, and R- 
 factors based on ALL data will be even larger. 
; 
 
_refine_ls_structure_factor_coef  Fsqd  
_refine_ls_matrix_type            full 
_refine_ls_weighting_scheme       calc  
_refine_ls_weighting_details 
 'calc w=1/[\s^2^(Fo^2^)+(0.0349P)^2^+2.1140P] where P=(Fo^2^+2Fc^2^)/3' 
_atom_sites_solution_primary      direct 
_atom_sites_solution_secondary    difmap 
_atom_sites_solution_hydrogens    mixed
_refine_ls_hydrogen_treatment     mixed 
_refine_ls_extinction_method      none 
_refine_ls_extinction_coef        ? 
_refine_ls_number_reflns          11638 
_refine_ls_number_parameters      619 
_refine_ls_number_restraints      0 
_refine_ls_R_factor_all           0.0507 
_refine_ls_R_factor_gt            0.0317 
_refine_ls_wR_factor_ref          0.0786 
_refine_ls_wR_factor_gt           0.0715 
_refine_ls_goodness_of_fit_ref    1.011 
_refine_ls_restrained_S_all       1.011 
_refine_ls_shift/su_max           0.003 
_refine_ls_shift/su_mean          0.000 
 
loop_ 
 _atom_site_label 
 _atom_site_type_symbol 
 _atom_site_fract_x 
 _atom_site_fract_y 
 _atom_site_fract_z 
 _atom_site_U_iso_or_equiv 
 _atom_site_adp_type 
 _atom_site_occupancy 
 _atom_site_symmetry_multiplicity 
 _atom_site_calc_flag 
 _atom_site_refinement_flags 
 _atom_site_disorder_assembly 
 _atom_site_disorder_group 
S1 S 0.17111(3) 1.24172(3) 0.43612(2) 0.02719(10) Uani 1 1 d . . . 
Br1 Br 0.173727(17) 0.664020(14) 0.561679(11) 0.04500(7) Uani 1 1 d . . . 
N11 N 0.11672(10) 1.01365(10) 0.46767(7) 0.0241(3) Uani 1 1 d . . . 
N12 N 0.22529(10) 0.98814(11) 0.72782(7) 0.0228(3) Uani 1 1 d . . . 
H12 H 0.2601(14) 0.9429(15) 0.7245(9) 0.032(6) Uiso 1 1 d . . . 
O11 O 0.16795(9) 0.78613(9) 0.67157(6) 0.0292(3) Uani 1 1 d . . . 
H11 H 0.2232(19) 0.765(2) 0.6849(13) 0.068(9) Uiso 1 1 d . . . 
O12 O 0.09451(9) 1.25521(9) 0.56623(6) 0.0317(3) Uani 1 1 d . . . 
O13 O 0.05070(10) 1.15712(9) 0.62723(6) 0.0349(3) Uani 1 1 d . . . 
C11 C 0.09927(11) 1.09988(12) 0.48842(8) 0.0229(4) Uani 1 1 d . . . 
C12 C 0.10143(11) 1.09126(12) 0.54941(8) 0.0223(3) Uani 1 1 d . . . 
C13 C 0.12128(11) 0.99224(12) 0.56730(8) 0.0208(3) Uani 1 1 d . . . 
C14 C 0.13577(11) 0.93620(12) 0.62147(8) 0.0217(3) Uani 1 1 d . . . 
C15 C 0.15513(11) 0.83890(12) 0.61965(8) 0.0235(4) Uani 1 1 d . . . 
C16 C 0.15745(12) 0.79739(12) 0.56426(9) 0.0263(4) Uani 1 1 d . . . 
C17 C 0.14619(12) 0.84991(12) 0.51136(9) 0.0261(4) Uani 1 1 d . . . 
H17 H 0.1494 0.8213 0.4746 0.031 Uiso 1 1 calc R . . 
C18 C 0.12994(11) 0.94692(12) 0.51441(8) 0.0230(4) Uani 1 1 d . . . 
C19 C 0.12070(13) 0.99036(14) 0.40646(8) 0.0292(4) Uani 1 1 d . . . 
H19A H 0.1103 1.0482 0.3809 0.044 Uiso 1 1 calc R . . 
H19B H 0.0750 0.9428 0.3865 0.044 Uiso 1 1 calc R . . 
H19C H 0.1795 0.9644 0.4109 0.044 Uiso 1 1 calc R . . 
C20 C 0.07338(12) 1.18271(13) 0.44509(8) 0.0252(4) Uani 1 1 d . . . 
H20A H 0.0398 1.2293 0.4611 0.030 Uiso 1 1 calc R . . 
H20B H 0.0338 1.1604 0.4040 0.030 Uiso 1 1 calc R . . 
C21 C 0.07994(12) 1.16784(12) 0.58527(8) 0.0250(4) Uani 1 1 d . . . 
C22 C 0.13286(11) 0.97195(13) 0.68286(8) 0.0245(4) Uani 1 1 d . . . 
H22A H 0.0990 1.0325 0.6764 0.029 Uiso 1 1 calc R . . 
H22B H 0.1018 0.9247 0.7004 0.029 Uiso 1 1 calc R . . 
C23 C 0.11306(12) 1.32815(12) 0.38004(8) 0.0251(4) Uani 1 1 d . . . 
C24 C 0.05825(13) 1.30029(14) 0.32140(9) 0.0335(4) Uani 1 1 d . . . 
H24 H 0.0534 1.2347 0.3103 0.040 Uiso 1 1 calc R . . 
C25 C 0.01060(14) 1.36812(16) 0.27906(10) 0.0393(5) Uani 1 1 d . . . 
H25 H -0.0278 1.3486 0.2393 0.047 Uiso 1 1 calc R . . 
C26 C 0.01863(14) 1.46350(16) 0.29429(10) 0.0399(5) Uani 1 1 d . . . 
H26 H -0.0144 1.5097 0.2652 0.048 Uiso 1 1 calc R . . 
C27 C 0.07490(15) 1.49191(14) 0.35193(11) 0.0395(5) Uani 1 1 d . . . 
H27 H 0.0817 1.5579 0.3620 0.047 Uiso 1 1 calc R . . 
C28 C 0.12171(13) 1.42445(13) 0.39540(9) 0.0318(4) Uani 1 1 d . . . 
H28 H 0.1593 1.4442 0.4353 0.038 Uiso 1 1 calc R . . 
C29 C 0.06606(16) 1.33464(13) 0.59566(11) 0.0393(5) Uani 1 1 d . . . 
H29A H 0.1030 1.3385 0.6401 0.047 Uiso 1 1 calc R . . 
H29B H 0.0031 1.3265 0.5926 0.047 Uiso 1 1 calc R . . 
C30 C 0.07680(16) 1.42301(14) 0.56234(10) 0.0413(5) Uani 1 1 d . . . 
H30A H 0.0579 1.4786 0.5808 0.062 Uiso 1 1 calc R . . 
H30B H 0.0401 1.4181 0.5184 0.062 Uiso 1 1 calc R . . 
H30C H 0.1394 1.4304 0.5660 0.062 Uiso 1 1 calc R . . 
C31 C 0.22639(14) 0.99109(15) 0.79306(9) 0.0356(5) Uani 1 1 d . . . 
H31A H 0.2876 0.9998 0.8211 0.053 Uiso 1 1 calc R . . 
H31B H 0.2027 0.9310 0.8029 0.053 Uiso 1 1 calc R . . 
H31C H 0.1896 1.0443 0.7980 0.053 Uiso 1 1 calc R . . 
C32 C 0.26434(13) 1.07713(13) 0.71265(9) 0.0313(4) Uani 1 1 d . . . 
H32A H 0.3263 1.0830 0.7401 0.047 Uiso 1 1 calc R . . 
H32B H 0.2303 1.1323 0.7185 0.047 Uiso 1 1 calc R . . 
H32C H 0.2622 1.0748 0.6694 0.047 Uiso 1 1 calc R . . 
S2 S 0.84554(3) 0.29287(3) 1.10390(2) 0.02860(10) Uani 1 1 d . . . 
Br2 Br 0.800130(17) 0.826714(14) 0.918214(10) 0.04163(7) Uani 1 1 d . . . 
N21 N 0.88873(10) 0.50886(10) 1.04958(6) 0.0222(3) Uani 1 1 d . . . 
N22 N 0.77174(10) 0.46764(11) 0.78865(6) 0.0218(3) Uani 1 1 d . . . 
H22 H 0.7333(13) 0.5139(14) 0.7891(9) 0.025(5) Uiso 1 1 d . . . 
O21 O 0.82179(9) 0.67982(10) 0.82316(6) 0.0292(3) Uani 1 1 d . . . 
H21 H 0.7657(18) 0.6996(18) 0.8058(12) 0.058(8) Uiso 1 1 d . . . 
O22 O 0.92259(9) 0.24483(9) 0.98196(6) 0.0334(3) Uani 1 1 d . . . 
O23 O 0.95055(9) 0.31982(10) 0.90410(6) 0.0327(3) Uani 1 1 d . . . 
C41 C 0.91174(11) 0.41851(12) 1.03876(8) 0.0223(3) Uani 1 1 d . . . 
C42 C 0.90554(11) 0.41001(12) 0.97687(8) 0.0223(3) Uani 1 1 d . . . 
C43 C 0.87829(11) 0.50222(12) 0.94801(8) 0.0211(3) Uani 1 1 d . . . 
C44 C 0.85930(11) 0.54400(13) 0.88838(8) 0.0220(3) Uani 1 1 d . . . 
C45 C 0.83507(11) 0.64030(13) 0.87962(8) 0.0231(4) Uani 1 1 d . . . 
C46 C 0.82885(12) 0.69537(13) 0.92970(8) 0.0246(4) Uani 1 1 d . . . 
C47 C 0.84450(12) 0.65672(12) 0.98776(8) 0.0240(4) Uani 1 1 d . . . 
H47 H 0.8392 0.6939 1.0210 0.029 Uiso 1 1 calc R . . 
C48 C 0.86832(11) 0.56133(12) 0.99547(7) 0.0212(3) Uani 1 1 d . . . 
C49 C 0.88343(12) 0.54805(13) 1.10725(8) 0.0263(4) Uani 1 1 d . . . 
H49A H 0.8996 0.4986 1.1394 0.039 Uiso 1 1 calc R . . 
H49B H 0.8226 0.5698 1.1006 0.039 Uiso 1 1 calc R . . 
H49C H 0.9245 0.6021 1.1205 0.039 Uiso 1 1 calc R . . 
C50 C 0.94182(12) 0.34874(13) 1.09072(8) 0.0251(4) Uani 1 1 d . . . 
H50A H 0.9787 0.3818 1.1290 0.030 Uiso 1 1 calc R . . 
H50B H 0.9788 0.2989 1.0807 0.030 Uiso 1 1 calc R . . 
C51 C 0.92836(11) 0.32342(13) 0.94966(8) 0.0248(4) Uani 1 1 d . . . 
C52 C 0.86365(11) 0.49293(13) 0.83141(8) 0.0246(4) Uani 1 1 d . . . 
H52A H 0.8932 0.5344 0.8092 0.030 Uiso 1 1 calc R . . 
H52B H 0.8994 0.4340 0.8440 0.030 Uiso 1 1 calc R . . 
C53 C 0.87878(12) 0.17153(12) 1.11097(8) 0.0257(4) Uani 1 1 d . . . 
C54 C 0.95503(14) 0.14046(15) 1.15711(10) 0.0405(5) Uani 1 1 d . . . 
H54 H 0.9920 0.1851 1.1855 0.049 Uiso 1 1 calc R . . 
C55 C 0.97768(16) 0.04473(17) 1.16212(12) 0.0502(6) Uani 1 1 d . . . 
H55 H 1.0300 0.0238 1.1939 0.060 Uiso 1 1 calc R . . 
C56 C 0.92439(17) -0.02023(15) 1.12103(11) 0.0457(6) Uani 1 1 d . . . 
H56 H 0.9393 -0.0861 1.1248 0.055 Uiso 1 1 calc R . . 
C57 C 0.84962(17) 0.01051(15) 1.07457(11) 0.0438(5) Uani 1 1 d . . . 
H57 H 0.8137 -0.0342 1.0457 0.053 Uiso 1 1 calc R . . 
C58 C 0.82612(14) 0.10587(14) 1.06941(9) 0.0339(4) Uani 1 1 d . . . 
H58 H 0.7739 0.1264 1.0374 0.041 Uiso 1 1 calc R . . 
C59 C 0.94991(15) 0.15509(14) 0.96247(11) 0.0391(5) Uani 1 1 d . . . 
H59A H 0.9688 0.1106 0.9981 0.047 Uiso 1 1 calc R . . 
H59B H 1.0015 0.1662 0.9486 0.047 Uiso 1 1 calc R . . 
C60 C 0.87584(16) 0.11065(17) 0.91061(12) 0.0539(6) Uani 1 1 d . . . 
H60A H 0.8935 0.0465 0.9022 0.081 Uiso 1 1 calc R . . 
H60B H 0.8631 0.1500 0.8732 0.081 Uiso 1 1 calc R . . 
H60C H 0.8225 0.1064 0.9225 0.081 Uiso 1 1 calc R . . 
C61 C 0.76901(13) 0.45946(15) 0.72338(8) 0.0332(4) Uani 1 1 d . . . 
H61A H 0.7083 0.4442 0.6966 0.050 Uiso 1 1 calc R . . 
H61B H 0.8095 0.4087 0.7203 0.050 Uiso 1 1 calc R . . 
H61C H 0.7875 0.5201 0.7102 0.050 Uiso 1 1 calc R . . 
C62 C 0.73906(13) 0.37862(13) 0.80873(10) 0.0328(4) Uani 1 1 d . . . 
H62A H 0.6764 0.3688 0.7838 0.049 Uiso 1 1 calc R . . 
H62B H 0.7448 0.3839 0.8526 0.049 Uiso 1 1 calc R . . 
H62C H 0.7743 0.3244 0.8031 0.049 Uiso 1 1 calc R . . 
O1 O 0.36211(8) 0.87795(9) 0.72888(6) 0.0295(3) Uani 1 1 d . . . 
O2 O 0.32689(8) 0.72399(9) 0.71020(7) 0.0319(3) Uani 1 1 d . . . 
O3 O 0.66247(8) 0.73030(9) 0.77233(6) 0.0319(3) Uani 1 1 d . . . 
O4 O 0.63135(8) 0.57565(9) 0.77823(6) 0.0295(3) Uani 1 1 d . . . 
C1 C 0.38164(12) 0.79178(12) 0.72512(8) 0.0228(3) Uani 1 1 d . . . 
C2 C 0.47834(11) 0.76970(12) 0.73985(8) 0.0248(4) Uani 1 1 d . . . 
H2 H 0.5175 0.8214 0.7413 0.030 Uiso 1 1 calc R . . 
C3 C 0.51249(11) 0.68391(12) 0.75086(8) 0.0243(4) Uani 1 1 d . . . 
H3 H 0.4729 0.6320 0.7476 0.029 Uiso 1 1 calc R . . 
C4 C 0.60953(12) 0.66195(12) 0.76830(8) 0.0231(4) Uani 1 1 d . . . 
 
loop_ 
 _atom_site_aniso_label 
 _atom_site_aniso_U_11 
 _atom_site_aniso_U_22 
 _atom_site_aniso_U_33 
 _atom_site_aniso_U_23 
 _atom_site_aniso_U_13 
 _atom_site_aniso_U_12 
S1 0.0236(2) 0.0279(2) 0.0265(2) 0.00761(18) 0.00376(18) 0.00012(18) 
Br1 0.06441(16) 0.02024(10) 0.04761(13) 0.00043(8) 0.01529(11) 0.00577(9) 
N11 0.0258(8) 0.0260(8) 0.0207(7) 0.0018(6) 0.0082(6) 0.0004(6) 
N12 0.0251(8) 0.0226(7) 0.0224(7) 0.0014(6) 0.0100(6) 0.0054(6) 
O11 0.0260(7) 0.0283(7) 0.0335(7) 0.0117(6) 0.0105(6) 0.0019(6) 
O12 0.0455(8) 0.0203(6) 0.0364(8) 0.0017(5) 0.0229(6) 0.0039(6) 
O13 0.0480(9) 0.0300(7) 0.0352(8) 0.0056(6) 0.0252(7) 0.0071(6) 
C11 0.0185(8) 0.0246(9) 0.0256(9) 0.0026(7) 0.0076(7) -0.0001(7) 
C12 0.0205(8) 0.0232(8) 0.0241(9) 0.0032(7) 0.0086(7) 0.0015(7) 
C13 0.0176(8) 0.0219(8) 0.0230(8) 0.0003(7) 0.0068(7) 0.0007(6) 
C14 0.0170(8) 0.0239(8) 0.0238(9) 0.0024(7) 0.0063(7) -0.0006(7) 
C15 0.0156(8) 0.0256(9) 0.0286(9) 0.0056(7) 0.0064(7) -0.0016(7) 
C16 0.0245(9) 0.0178(8) 0.0351(10) -0.0005(7) 0.0080(8) 0.0005(7) 
C17 0.0237(9) 0.0256(9) 0.0280(9) -0.0032(7) 0.0075(7) 0.0006(7) 
C18 0.0196(8) 0.0247(9) 0.0240(9) 0.0018(7) 0.0066(7) 0.0002(7) 
C19 0.0327(10) 0.0330(10) 0.0224(9) -0.0007(7) 0.0100(8) -0.0021(8) 
C20 0.0224(9) 0.0280(9) 0.0244(9) 0.0059(7) 0.0069(7) 0.0012(7) 
C21 0.0253(9) 0.0230(9) 0.0262(9) 0.0043(7) 0.0082(7) 0.0037(7) 
C22 0.0210(9) 0.0290(9) 0.0254(9) 0.0058(7) 0.0104(7) 0.0029(7) 
C23 0.0250(9) 0.0256(9) 0.0258(9) 0.0072(7) 0.0101(7) 0.0036(7) 
C24 0.0402(11) 0.0296(10) 0.0291(10) 0.0043(8) 0.0096(9) 0.0045(9) 
C25 0.0374(11) 0.0469(13) 0.0291(11) 0.0109(9) 0.0054(9) 0.0081(10) 
C26 0.0361(11) 0.0421(12) 0.0448(13) 0.0220(10) 0.0180(10) 0.0132(9) 
C27 0.0460(13) 0.0244(10) 0.0561(14) 0.0072(9) 0.0277(11) 0.0064(9) 
C28 0.0347(11) 0.0286(10) 0.0350(11) 0.0008(8) 0.0157(9) -0.0001(8) 
C29 0.0561(14) 0.0241(10) 0.0450(12) -0.0023(9) 0.0268(11) 0.0041(9) 
C30 0.0542(14) 0.0251(10) 0.0444(12) 0.0018(9) 0.0166(11) 0.0073(9) 
C31 0.0436(12) 0.0412(11) 0.0228(9) 0.0018(8) 0.0121(9) 0.0077(9) 
C32 0.0296(10) 0.0261(9) 0.0398(11) -0.0009(8) 0.0139(9) -0.0017(8) 
S2 0.0272(2) 0.0240(2) 0.0378(3) 0.00337(19) 0.0151(2) 0.00219(18) 
Br2 0.06413(15) 0.02582(10) 0.03036(11) 0.00504(8) 0.00992(10) 0.00530(9) 
N21 0.0257(8) 0.0242(7) 0.0166(7) -0.0003(6) 0.0069(6) -0.0005(6) 
N22 0.0212(7) 0.0250(7) 0.0182(7) -0.0026(6) 0.0053(6) 0.0032(6) 
O21 0.0235(7) 0.0425(8) 0.0200(6) 0.0086(6) 0.0055(5) 0.0002(6) 
O22 0.0416(8) 0.0250(7) 0.0367(8) -0.0015(6) 0.0175(6) 0.0036(6) 
O23 0.0349(8) 0.0374(8) 0.0288(7) -0.0041(6) 0.0146(6) 0.0048(6) 
C41 0.0184(8) 0.0261(9) 0.0214(8) 0.0008(7) 0.0054(7) -0.0020(7) 
C42 0.0180(8) 0.0278(9) 0.0202(8) -0.0015(7) 0.0052(7) -0.0012(7) 
C43 0.0164(8) 0.0268(9) 0.0189(8) -0.0021(7) 0.0044(7) -0.0022(7) 
C44 0.0159(8) 0.0310(9) 0.0181(8) -0.0018(7) 0.0044(6) -0.0014(7) 
C45 0.0168(8) 0.0327(9) 0.0180(8) 0.0027(7) 0.0036(7) -0.0029(7) 
C46 0.0237(9) 0.0222(8) 0.0259(9) 0.0016(7) 0.0057(7) 0.0001(7) 
C47 0.0246(9) 0.0267(9) 0.0199(8) -0.0026(7) 0.0065(7) -0.0026(7) 
C48 0.0197(8) 0.0254(9) 0.0174(8) 0.0004(7) 0.0049(7) -0.0027(7) 
C49 0.0312(10) 0.0295(9) 0.0188(8) -0.0007(7) 0.0095(7) -0.0001(8) 
C50 0.0234(9) 0.0287(9) 0.0218(9) 0.0025(7) 0.0057(7) -0.0013(7) 
C51 0.0189(8) 0.0287(9) 0.0243(9) -0.0034(7) 0.0038(7) 0.0004(7) 
C52 0.0185(8) 0.0363(10) 0.0187(8) -0.0003(7) 0.0058(7) 0.0005(7) 
C53 0.0278(9) 0.0241(9) 0.0274(9) 0.0030(7) 0.0121(8) 0.0010(7) 
C54 0.0351(11) 0.0324(11) 0.0439(12) 0.0012(9) -0.0002(9) 0.0025(9) 
C55 0.0407(13) 0.0406(13) 0.0645(16) 0.0139(12) 0.0113(12) 0.0127(10) 
C56 0.0644(16) 0.0248(10) 0.0625(16) 0.0055(10) 0.0407(13) 0.0072(10) 
C57 0.0654(16) 0.0298(11) 0.0430(13) -0.0063(9) 0.0270(12) -0.0149(10) 
C58 0.0404(11) 0.0327(10) 0.0277(10) 0.0014(8) 0.0103(9) -0.0083(9) 
C59 0.0438(12) 0.0271(10) 0.0476(13) -0.0039(9) 0.0169(10) 0.0067(9) 
C60 0.0477(14) 0.0424(13) 0.0713(17) -0.0205(12) 0.0197(13) -0.0033(11) 
C61 0.0339(11) 0.0445(12) 0.0189(9) -0.0060(8) 0.0060(8) 0.0056(9) 
C62 0.0307(10) 0.0280(10) 0.0406(11) -0.0013(8) 0.0132(9) -0.0006(8) 
O1 0.0259(7) 0.0191(6) 0.0426(8) -0.0021(5) 0.0102(6) 0.0025(5) 
O2 0.0242(7) 0.0186(6) 0.0495(8) 0.0039(6) 0.0077(6) -0.0005(5) 
O3 0.0244(7) 0.0245(7) 0.0424(8) 0.0077(6) 0.0055(6) -0.0021(5) 
O4 0.0241(7) 0.0201(6) 0.0424(8) 0.0001(5) 0.0088(6) 0.0031(5) 
C1 0.0251(9) 0.0211(8) 0.0220(8) 0.0034(7) 0.0077(7) 0.0020(7) 
C2 0.0223(9) 0.0212(8) 0.0303(9) 0.0002(7) 0.0078(7) -0.0019(7) 
C3 0.0226(9) 0.0215(9) 0.0279(9) 0.0008(7) 0.0075(7) -0.0008(7) 
C4 0.0244(9) 0.0246(9) 0.0196(8) 0.0011(7) 0.0063(7) 0.0014(7) 
 
_geom_special_details 
; 
 All esds (except the esd in the dihedral angle between two l.s. planes) 
 are estimated using the full covariance matrix.  The cell esds are taken 
 into account individually in the estimation of esds in distances, angles 
 and torsion angles; correlations between esds in cell parameters are only 
 used when they are defined by crystal symmetry.  An approximate (isotropic) 
 treatment of cell esds is used for estimating esds involving l.s. planes. 
; 
 
loop_ 
 _geom_bond_atom_site_label_1 
 _geom_bond_atom_site_label_2 
 _geom_bond_distance 
 _geom_bond_site_symmetry_2 
 _geom_bond_publ_flag 
S1 C23 1.7807(18) . ? 
S1 C20 1.8380(18) . ? 
Br1 C16 1.8899(18) . ? 
N11 C11 1.361(2) . ? 
N11 C18 1.382(2) . ? 
N11 C19 1.461(2) . ? 
N12 C32 1.487(2) . ? 
N12 C31 1.488(2) . ? 
N12 C22 1.505(2) . ? 
N12 H12 0.86(2) . ? 
O11 C15 1.355(2) . ? 
O11 H11 0.88(3) . ? 
O12 C21 1.346(2) . ? 
O12 C29 1.451(2) . ? 
O13 C21 1.211(2) . ? 
C11 C12 1.390(2) . ? 
C11 C20 1.492(2) . ? 
C12 C13 1.451(2) . ? 
C12 C21 1.460(2) . ? 
C13 C18 1.415(2) . ? 
C13 C14 1.419(2) . ? 
C14 C15 1.401(2) . ? 
C14 C22 1.507(2) . ? 
C15 C16 1.407(3) . ? 
C16 C17 1.376(3) . ? 
C17 C18 1.390(2) . ? 
C17 H17 0.9500 . ? 
C19 H19A 0.9800 . ? 
C19 H19B 0.9800 . ? 
C19 H19C 0.9800 . ? 
C20 H20A 0.9900 . ? 
C20 H20B 0.9900 . ? 
C22 H22A 0.9900 . ? 
C22 H22B 0.9900 . ? 
C23 C24 1.388(3) . ? 
C23 C28 1.389(3) . ? 
C24 C25 1.387(3) . ? 
C24 H24 0.9500 . ? 
C25 C26 1.376(3) . ? 
C25 H25 0.9500 . ? 
C26 C27 1.381(3) . ? 
C26 H26 0.9500 . ? 
C27 C28 1.393(3) . ? 
C27 H27 0.9500 . ? 
C28 H28 0.9500 . ? 
C29 C30 1.494(3) . ? 
C29 H29A 0.9900 . ? 
C29 H29B 0.9900 . ? 
C30 H30A 0.9800 . ? 
C30 H30B 0.9800 . ? 
C30 H30C 0.9800 . ? 
C31 H31A 0.9800 . ? 
C31 H31B 0.9800 . ? 
C31 H31C 0.9800 . ? 
C32 H32A 0.9800 . ? 
C32 H32B 0.9800 . ? 
C32 H32C 0.9800 . ? 
S2 C53 1.7717(18) . ? 
S2 C50 1.8388(18) . ? 
Br2 C46 1.8930(18) . ? 
N21 C41 1.364(2) . ? 
N21 C48 1.382(2) . ? 
N21 C49 1.458(2) . ? 
N22 C62 1.483(2) . ? 
N22 C61 1.485(2) . ? 
N22 C52 1.506(2) . ? 
N22 H22 0.89(2) . ? 
O21 C45 1.355(2) . ? 
O21 H21 0.89(3) . ? 
O22 C51 1.347(2) . ? 
O22 C59 1.449(2) . ? 
O23 C51 1.210(2) . ? 
C41 C42 1.392(2) . ? 
C41 C50 1.488(2) . ? 
C42 C43 1.449(2) . ? 
C42 C51 1.465(2) . ? 
C43 C48 1.417(2) . ? 
C43 C44 1.421(2) . ? 
C44 C45 1.399(2) . ? 
C44 C52 1.509(2) . ? 
C45 C46 1.413(2) . ? 
C46 C47 1.378(2) . ? 
C47 C48 1.384(2) . ? 
C47 H47 0.9500 . ? 
C49 H49A 0.9800 . ? 
C49 H49B 0.9800 . ? 
C49 H49C 0.9800 . ? 
C50 H50A 0.9900 . ? 
C50 H50B 0.9900 . ? 
C52 H52A 0.9900 . ? 
C52 H52B 0.9900 . ? 
C53 C58 1.385(3) . ? 
C53 C54 1.386(3) . ? 
C54 C55 1.384(3) . ? 
C54 H54 0.9500 . ? 
C55 C56 1.377(3) . ? 
C55 H55 0.9500 . ? 
C56 C57 1.373(3) . ? 
C56 H56 0.9500 . ? 
C57 C58 1.382(3) . ? 
C57 H57 0.9500 . ? 
C58 H58 0.9500 . ? 
C59 C60 1.500(3) . ? 
C59 H59A 0.9900 . ? 
C59 H59B 0.9900 . ? 
C60 H60A 0.9800 . ? 
C60 H60B 0.9800 . ? 
C60 H60C 0.9800 . ? 
C61 H61A 0.9800 . ? 
C61 H61B 0.9800 . ? 
C61 H61C 0.9800 . ? 
C62 H62A 0.9800 . ? 
C62 H62B 0.9800 . ? 
C62 H62C 0.9800 . ? 
O1 C1 1.257(2) . ? 
O2 C1 1.258(2) . ? 
O3 C4 1.260(2) . ? 
O4 C4 1.257(2) . ? 
C1 C2 1.498(2) . ? 
C2 C3 1.309(2) . ? 
C2 H2 0.9500 . ? 
C3 C4 1.496(2) . ? 
C3 H3 0.9500 . ? 
 
loop_ 
 _geom_angle_atom_site_label_1 
 _geom_angle_atom_site_label_2 
 _geom_angle_atom_site_label_3 
 _geom_angle 
 _geom_angle_site_symmetry_1 
 _geom_angle_site_symmetry_3 
 _geom_angle_publ_flag 
C23 S1 C20 97.53(8) . . ? 
C11 N11 C18 109.02(14) . . ? 
C11 N11 C19 127.84(15) . . ? 
C18 N11 C19 123.14(15) . . ? 
C32 N12 C31 110.33(15) . . ? 
C32 N12 C22 111.01(14) . . ? 
C31 N12 C22 111.55(14) . . ? 
C32 N12 H12 105.2(14) . . ? 
C31 N12 H12 108.6(14) . . ? 
C22 N12 H12 109.9(14) . . ? 
C15 O11 H11 109.1(18) . . ? 
C21 O12 C29 115.57(14) . . ? 
N11 C11 C12 109.57(15) . . ? 
N11 C11 C20 120.12(15) . . ? 
C12 C11 C20 130.01(16) . . ? 
C11 C12 C13 107.19(15) . . ? 
C11 C12 C21 124.75(15) . . ? 
C13 C12 C21 127.88(15) . . ? 
C18 C13 C14 117.74(15) . . ? 
C18 C13 C12 105.23(14) . . ? 
C14 C13 C12 136.99(16) . . ? 
C15 C14 C13 118.98(16) . . ? 
C15 C14 C22 115.30(15) . . ? 
C13 C14 C22 125.71(15) . . ? 
O11 C15 C14 118.29(16) . . ? 
O11 C15 C16 121.53(16) . . ? 
C14 C15 C16 120.13(16) . . ? 
C17 C16 C15 122.48(16) . . ? 
C17 C16 Br1 118.65(14) . . ? 
C15 C16 Br1 118.85(13) . . ? 
C16 C17 C18 116.72(17) . . ? 
C16 C17 H17 121.6 . . ? 
C18 C17 H17 121.6 . . ? 
N11 C18 C17 127.20(16) . . ? 
N11 C18 C13 109.00(15) . . ? 
C17 C18 C13 123.77(16) . . ? 
N11 C19 H19A 109.5 . . ? 
N11 C19 H19B 109.5 . . ? 
H19A C19 H19B 109.5 . . ? 
N11 C19 H19C 109.5 . . ? 
H19A C19 H19C 109.5 . . ? 
H19B C19 H19C 109.5 . . ? 
C11 C20 S1 111.64(12) . . ? 
C11 C20 H20A 109.3 . . ? 
S1 C20 H20A 109.3 . . ? 
C11 C20 H20B 109.3 . . ? 
S1 C20 H20B 109.3 . . ? 
H20A C20 H20B 108.0 . . ? 
O13 C21 O12 121.66(16) . . ? 
O13 C21 C12 125.57(16) . . ? 
O12 C21 C12 112.76(15) . . ? 
N12 C22 C14 110.86(13) . . ? 
N12 C22 H22A 109.5 . . ? 
C14 C22 H22A 109.5 . . ? 
N12 C22 H22B 109.5 . . ? 
C14 C22 H22B 109.5 . . ? 
H22A C22 H22B 108.1 . . ? 
C24 C23 C28 119.61(17) . . ? 
C24 C23 S1 120.74(14) . . ? 
C28 C23 S1 119.65(14) . . ? 
C25 C24 C23 120.10(19) . . ? 
C25 C24 H24 119.9 . . ? 
C23 C24 H24 119.9 . . ? 
C26 C25 C24 120.4(2) . . ? 
C26 C25 H25 119.8 . . ? 
C24 C25 H25 119.8 . . ? 
C25 C26 C27 119.80(19) . . ? 
C25 C26 H26 120.1 . . ? 
C27 C26 H26 120.1 . . ? 
C26 C27 C28 120.4(2) . . ? 
C26 C27 H27 119.8 . . ? 
C28 C27 H27 119.8 . . ? 
C23 C28 C27 119.63(19) . . ? 
C23 C28 H28 120.2 . . ? 
C27 C28 H28 120.2 . . ? 
O12 C29 C30 106.89(16) . . ? 
O12 C29 H29A 110.3 . . ? 
C30 C29 H29A 110.3 . . ? 
O12 C29 H29B 110.3 . . ? 
C30 C29 H29B 110.3 . . ? 
H29A C29 H29B 108.6 . . ? 
C29 C30 H30A 109.5 . . ? 
C29 C30 H30B 109.5 . . ? 
H30A C30 H30B 109.5 . . ? 
C29 C30 H30C 109.5 . . ? 
H30A C30 H30C 109.5 . . ? 
H30B C30 H30C 109.5 . . ? 
N12 C31 H31A 109.5 . . ? 
N12 C31 H31B 109.5 . . ? 
H31A C31 H31B 109.5 . . ? 
N12 C31 H31C 109.5 . . ? 
H31A C31 H31C 109.5 . . ? 
H31B C31 H31C 109.5 . . ? 
N12 C32 H32A 109.5 . . ? 
N12 C32 H32B 109.5 . . ? 
H32A C32 H32B 109.5 . . ? 
N12 C32 H32C 109.5 . . ? 
H32A C32 H32C 109.5 . . ? 
H32B C32 H32C 109.5 . . ? 
C53 S2 C50 100.49(8) . . ? 
C41 N21 C48 109.11(14) . . ? 
C41 N21 C49 127.98(14) . . ? 
C48 N21 C49 122.91(15) . . ? 
C62 N22 C61 110.68(15) . . ? 
C62 N22 C52 111.34(14) . . ? 
C61 N22 C52 111.31(14) . . ? 
C62 N22 H22 107.0(12) . . ? 
C61 N22 H22 106.2(12) . . ? 
C52 N22 H22 110.1(12) . . ? 
C45 O21 H21 111.3(17) . . ? 
C51 O22 C59 117.15(15) . . ? 
N21 C41 C42 109.47(15) . . ? 
N21 C41 C50 119.88(15) . . ? 
C42 C41 C50 130.58(16) . . ? 
C41 C42 C43 107.17(15) . . ? 
C41 C42 C51 124.15(16) . . ? 
C43 C42 C51 128.59(15) . . ? 
C48 C43 C44 116.95(16) . . ? 
C48 C43 C42 105.38(14) . . ? 
C44 C43 C42 137.66(16) . . ? 
C45 C44 C43 119.60(15) . . ? 
C45 C44 C52 115.11(15) . . ? 
C43 C44 C52 125.29(16) . . ? 
O21 C45 C44 118.50(16) . . ? 
O21 C45 C46 121.30(16) . . ? 
C44 C45 C46 120.13(15) . . ? 
C47 C46 C45 121.92(16) . . ? 
C47 C46 Br2 118.20(13) . . ? 
C45 C46 Br2 119.87(13) . . ? 
C46 C47 C48 117.07(16) . . ? 
C46 C47 H47 121.5 . . ? 
C48 C47 H47 121.5 . . ? 
N21 C48 C47 126.83(16) . . ? 
N21 C48 C43 108.85(15) . . ? 
C47 C48 C43 124.28(16) . . ? 
N21 C49 H49A 109.5 . . ? 
N21 C49 H49B 109.5 . . ? 
H49A C49 H49B 109.5 . . ? 
N21 C49 H49C 109.5 . . ? 
H49A C49 H49C 109.5 . . ? 
H49B C49 H49C 109.5 . . ? 
C41 C50 S2 110.38(12) . . ? 
C41 C50 H50A 109.6 . . ? 
S2 C50 H50A 109.6 . . ? 
C41 C50 H50B 109.6 . . ? 
S2 C50 H50B 109.6 . . ? 
H50A C50 H50B 108.1 . . ? 
O23 C51 O22 122.23(16) . . ? 
O23 C51 C42 126.02(17) . . ? 
O22 C51 C42 111.75(15) . . ? 
N22 C52 C44 110.74(13) . . ? 
N22 C52 H52A 109.5 . . ? 
C44 C52 H52A 109.5 . . ? 
N22 C52 H52B 109.5 . . ? 
C44 C52 H52B 109.5 . . ? 
H52A C52 H52B 108.1 . . ? 
C58 C53 C54 119.27(18) . . ? 
C58 C53 S2 118.71(15) . . ? 
C54 C53 S2 122.02(15) . . ? 
C55 C54 C53 120.4(2) . . ? 
C55 C54 H54 119.8 . . ? 
C53 C54 H54 119.8 . . ? 
C56 C55 C54 120.0(2) . . ? 
C56 C55 H55 120.0 . . ? 
C54 C55 H55 120.0 . . ? 
C57 C56 C55 119.8(2) . . ? 
C57 C56 H56 120.1 . . ? 
C55 C56 H56 120.1 . . ? 
C56 C57 C58 120.6(2) . . ? 
C56 C57 H57 119.7 . . ? 
C58 C57 H57 119.7 . . ? 
C57 C58 C53 119.9(2) . . ? 
C57 C58 H58 120.0 . . ? 
C53 C58 H58 120.0 . . ? 
O22 C59 C60 111.39(18) . . ? 
O22 C59 H59A 109.4 . . ? 
C60 C59 H59A 109.4 . . ? 
O22 C59 H59B 109.4 . . ? 
C60 C59 H59B 109.4 . . ? 
H59A C59 H59B 108.0 . . ? 
C59 C60 H60A 109.5 . . ? 
C59 C60 H60B 109.5 . . ? 
H60A C60 H60B 109.5 . . ? 
C59 C60 H60C 109.5 . . ? 
H60A C60 H60C 109.5 . . ? 
H60B C60 H60C 109.5 . . ? 
N22 C61 H61A 109.5 . . ? 
N22 C61 H61B 109.5 . . ? 
H61A C61 H61B 109.5 . . ? 
N22 C61 H61C 109.5 . . ? 
H61A C61 H61C 109.5 . . ? 
H61B C61 H61C 109.5 . . ? 
N22 C62 H62A 109.5 . . ? 
N22 C62 H62B 109.5 . . ? 
H62A C62 H62B 109.5 . . ? 
N22 C62 H62C 109.5 . . ? 
H62A C62 H62C 109.5 . . ? 
H62B C62 H62C 109.5 . . ? 
O1 C1 O2 125.30(16) . . ? 
O1 C1 C2 116.34(15) . . ? 
O2 C1 C2 118.36(15) . . ? 
C3 C2 C1 124.34(16) . . ? 
C3 C2 H2 117.8 . . ? 
C1 C2 H2 117.8 . . ? 
C2 C3 C4 124.55(16) . . ? 
C2 C3 H3 117.7 . . ? 
C4 C3 H3 117.7 . . ? 
O4 C4 O3 125.39(16) . . ? 
O4 C4 C3 116.41(15) . . ? 
O3 C4 C3 118.19(15) . . ? 
 
loop_ 
 _geom_torsion_atom_site_label_1 
 _geom_torsion_atom_site_label_2 
 _geom_torsion_atom_site_label_3 
 _geom_torsion_atom_site_label_4 
 _geom_torsion 
 _geom_torsion_site_symmetry_1 
 _geom_torsion_site_symmetry_2 
 _geom_torsion_site_symmetry_3 
 _geom_torsion_site_symmetry_4 
 _geom_torsion_publ_flag 
C18 N11 C11 C12 0.4(2) . . . . ? 
C19 N11 C11 C12 179.74(16) . . . . ? 
C18 N11 C11 C20 -173.85(15) . . . . ? 
C19 N11 C11 C20 5.4(3) . . . . ? 
N11 C11 C12 C13 -0.28(19) . . . . ? 
C20 C11 C12 C13 173.27(17) . . . . ? 
N11 C11 C12 C21 -175.70(16) . . . . ? 
C20 C11 C12 C21 -2.1(3) . . . . ? 
C11 C12 C13 C18 0.01(19) . . . . ? 
C21 C12 C13 C18 175.25(17) . . . . ? 
C11 C12 C13 C14 177.44(19) . . . . ? 
C21 C12 C13 C14 -7.3(3) . . . . ? 
C18 C13 C14 C15 -1.9(2) . . . . ? 
C12 C13 C14 C15 -179.10(18) . . . . ? 
C18 C13 C14 C22 177.73(15) . . . . ? 
C12 C13 C14 C22 0.5(3) . . . . ? 
C13 C14 C15 O11 -179.37(15) . . . . ? 
C22 C14 C15 O11 1.0(2) . . . . ? 
C13 C14 C15 C16 -1.8(2) . . . . ? 
C22 C14 C15 C16 178.49(15) . . . . ? 
O11 C15 C16 C17 -178.81(16) . . . . ? 
C14 C15 C16 C17 3.7(3) . . . . ? 
O11 C15 C16 Br1 2.8(2) . . . . ? 
C14 C15 C16 Br1 -174.66(13) . . . . ? 
C15 C16 C17 C18 -1.6(3) . . . . ? 
Br1 C16 C17 C18 176.83(13) . . . . ? 
C11 N11 C18 C17 177.50(17) . . . . ? 
C19 N11 C18 C17 -1.8(3) . . . . ? 
C11 N11 C18 C13 -0.44(19) . . . . ? 
C19 N11 C18 C13 -179.77(15) . . . . ? 
C16 C17 C18 N11 179.88(17) . . . . ? 
C16 C17 C18 C13 -2.5(3) . . . . ? 
C14 C13 C18 N11 -177.76(15) . . . . ? 
C12 C13 C18 N11 0.25(18) . . . . ? 
C14 C13 C18 C17 4.2(3) . . . . ? 
C12 C13 C18 C17 -177.77(16) . . . . ? 
N11 C11 C20 S1 -82.39(18) . . . . ? 
C12 C11 C20 S1 104.63(19) . . . . ? 
C23 S1 C20 C11 177.04(13) . . . . ? 
C29 O12 C21 O13 -4.9(3) . . . . ? 
C29 O12 C21 C12 173.98(16) . . . . ? 
C11 C12 C21 O13 152.06(19) . . . . ? 
C13 C12 C21 O13 -22.4(3) . . . . ? 
C11 C12 C21 O12 -26.8(2) . . . . ? 
C13 C12 C21 O12 158.76(17) . . . . ? 
C32 N12 C22 C14 75.78(18) . . . . ? 
C31 N12 C22 C14 -160.72(15) . . . . ? 
C15 C14 C22 N12 79.04(18) . . . . ? 
C13 C14 C22 N12 -100.61(19) . . . . ? 
C20 S1 C23 C24 -64.44(17) . . . . ? 
C20 S1 C23 C28 114.66(16) . . . . ? 
C28 C23 C24 C25 -1.8(3) . . . . ? 
S1 C23 C24 C25 177.35(16) . . . . ? 
C23 C24 C25 C26 1.4(3) . . . . ? 
C24 C25 C26 C27 0.4(3) . . . . ? 
C25 C26 C27 C28 -1.8(3) . . . . ? 
C24 C23 C28 C27 0.4(3) . . . . ? 
S1 C23 C28 C27 -178.73(15) . . . . ? 
C26 C27 C28 C23 1.4(3) . . . . ? 
C21 O12 C29 C30 -172.57(17) . . . . ? 
C48 N21 C41 C42 -0.82(19) . . . . ? 
C49 N21 C41 C42 178.09(16) . . . . ? 
C48 N21 C41 C50 176.54(15) . . . . ? 
C49 N21 C41 C50 -4.6(3) . . . . ? 
N21 C41 C42 C43 1.06(19) . . . . ? 
C50 C41 C42 C43 -175.93(17) . . . . ? 
N21 C41 C42 C51 177.85(15) . . . . ? 
C50 C41 C42 C51 0.9(3) . . . . ? 
C41 C42 C43 C48 -0.88(18) . . . . ? 
C51 C42 C43 C48 -177.48(16) . . . . ? 
C41 C42 C43 C44 -179.67(19) . . . . ? 
C51 C42 C43 C44 3.7(3) . . . . ? 
C48 C43 C44 C45 2.1(2) . . . . ? 
C42 C43 C44 C45 -179.17(18) . . . . ? 
C48 C43 C44 C52 -178.47(15) . . . . ? 
C42 C43 C44 C52 0.2(3) . . . . ? 
C43 C44 C45 O21 176.61(15) . . . . ? 
C52 C44 C45 O21 -2.8(2) . . . . ? 
C43 C44 C45 C46 -0.5(2) . . . . ? 
C52 C44 C45 C46 -179.98(15) . . . . ? 
O21 C45 C46 C47 -178.24(16) . . . . ? 
C44 C45 C46 C47 -1.2(3) . . . . ? 
O21 C45 C46 Br2 0.7(2) . . . . ? 
C44 C45 C46 Br2 177.77(13) . . . . ? 
C45 C46 C47 C48 1.1(3) . . . . ? 
Br2 C46 C47 C48 -177.87(13) . . . . ? 
C41 N21 C48 C47 -177.92(17) . . . . ? 
C49 N21 C48 C47 3.1(3) . . . . ? 
C41 N21 C48 C43 0.24(19) . . . . ? 
C49 N21 C48 C43 -178.74(15) . . . . ? 
C46 C47 C48 N21 178.57(16) . . . . ? 
C46 C47 C48 C43 0.7(3) . . . . ? 
C44 C43 C48 N21 179.49(14) . . . . ? 
C42 C43 C48 N21 0.40(18) . . . . ? 
C44 C43 C48 C47 -2.3(3) . . . . ? 
C42 C43 C48 C47 178.62(16) . . . . ? 
N21 C41 C50 S2 82.94(17) . . . . ? 
C42 C41 C50 S2 -100.34(19) . . . . ? 
C53 S2 C50 C41 134.46(13) . . . . ? 
C59 O22 C51 O23 4.0(3) . . . . ? 
C59 O22 C51 C42 -175.54(15) . . . . ? 
C41 C42 C51 O23 -155.62(18) . . . . ? 
C43 C42 C51 O23 20.5(3) . . . . ? 
C41 C42 C51 O22 23.9(2) . . . . ? 
C43 C42 C51 O22 -160.00(16) . . . . ? 
C62 N22 C52 C44 -81.96(18) . . . . ? 
C61 N22 C52 C44 154.02(15) . . . . ? 
C45 C44 C52 N22 -77.83(19) . . . . ? 
C43 C44 C52 N22 102.74(19) . . . . ? 
C50 S2 C53 C58 -119.92(16) . . . . ? 
C50 S2 C53 C54 60.82(18) . . . . ? 
C58 C53 C54 C55 -0.9(3) . . . . ? 
S2 C53 C54 C55 178.39(18) . . . . ? 
C53 C54 C55 C56 0.1(4) . . . . ? 
C54 C55 C56 C57 1.0(4) . . . . ? 
C55 C56 C57 C58 -1.4(3) . . . . ? 
C56 C57 C58 C53 0.7(3) . . . . ? 
C54 C53 C58 C57 0.5(3) . . . . ? 
S2 C53 C58 C57 -178.82(15) . . . . ? 
C51 O22 C59 C60 -84.5(2) . . . . ? 
O1 C1 C2 C3 165.18(18) . . . . ? 
O2 C1 C2 C3 -14.8(3) . . . . ? 
C1 C2 C3 C4 -177.21(16) . . . . ? 
C2 C3 C4 O4 178.93(18) . . . . ? 
C2 C3 C4 O3 -0.5(3) . . . . ? 
 
loop_ 
 _geom_hbond_atom_site_label_D 
 _geom_hbond_atom_site_label_H 
 _geom_hbond_atom_site_label_A 
 _geom_hbond_distance_DH 
 _geom_hbond_distance_HA 
 _geom_hbond_distance_DA 
 _geom_hbond_angle_DHA 
 _geom_hbond_site_symmetry_A 
O11 H11 O2  0.88(3) 1.66(3) 2.5437(18) 180(3) . 
N12 H12 O1  0.86(2) 1.84(2) 2.6690(19) 161(2) . 
O21 H21 O3  0.89(3) 1.62(3) 2.5163(18) 177(3) . 
N22 H22 O4  0.89(2) 1.79(2) 2.6483(19) 161.0(18) . 
 
_diffrn_measured_fraction_theta_max    0.999 
_diffrn_reflns_theta_full              28.00 
_diffrn_measured_fraction_theta_full   0.999 
_refine_diff_density_max    0.519 
_refine_diff_density_min   -0.494 
_refine_diff_density_rms    0.054 
