# Supplementary material
Source: MDPI journal article supplement (https://www.mdpi.com/2073-4352/5/4/650)
Supplement: s1 [file s1 › 1433018.cif]

 
data_z 

_iucr_refine_instructions_details
;
TITL z in P-1
CELL 0.71073   8.3812  13.0305  13.2656  64.054  83.078  86.643
ZERR    2.00   0.0012   0.0018   0.0019   0.002   0.002   0.002
LATT  1
SFAC C H N O S BR
UNIT 52 58 4 14 2 2
TEMP -93
SIZE .25 .20 .15
 
HTAB O1 O21
HTAB N2 O22
HTAB O24 O21
 
L.S. 10
BOND $H
ACTA
CONF
FMAP 2
PLAN 6
OMIT -2 54
OMIT 0 1 0
OMIT 0 0 1
OMIT 0 1 1
 
WGHT    0.040000
FVAR       0.15587
S1    5    0.034584    0.218577   -0.013843    11.00000    0.03088    0.03238 =
         0.03586   -0.01631   -0.01499    0.00306
BR1   6    0.339832    0.698291    0.185323    11.00000    0.03592    0.01975 =
         0.03535   -0.01378   -0.00490    0.00055
N1    3    0.258794    0.424169   -0.006443    11.00000    0.02366    0.01915 =
         0.01701   -0.00560   -0.00587    0.00234
N2    3    0.469522    0.226868    0.437575    11.00000    0.03202    0.01839 =
         0.01869   -0.00618   -0.00617    0.00122
H2    2    0.456497    0.281765    0.457398    11.00000    0.03535
O1    4    0.521211    0.477841    0.326335    11.00000    0.02760    0.02908 =
         0.02532   -0.01536   -0.00651    0.00060
H1    2    0.459104    0.492876    0.368641    11.00000    0.05776
O2    4    0.455190    0.095529    0.097170    11.00000    0.03520    0.01938 =
         0.01935   -0.00942   -0.00596    0.00504
O3    4    0.452581    0.095917    0.265319    11.00000    0.05312    0.02233 =
         0.01865   -0.00880   -0.01017    0.00799
C1    1    0.301075    0.314393    0.015327    11.00000    0.02108    0.02121 =
         0.01706   -0.00675   -0.00048    0.00024
C2    1    0.384108    0.266901    0.110775    11.00000    0.02050    0.01852 =
         0.01600   -0.00654   -0.00025   -0.00027
C3    1    0.392907    0.354476    0.149493    11.00000    0.01822    0.01775 =
         0.01661   -0.00476    0.00019   -0.00074
C4    1    0.462211    0.365723    0.236379    11.00000    0.01727    0.01893 =
         0.01674   -0.00473   -0.00057   -0.00112
C5    1    0.444898    0.468702    0.245427    11.00000    0.01935    0.02356 =
         0.01886   -0.00900   -0.00039   -0.00403
C6    1    0.360865    0.560629    0.168995    11.00000    0.02129    0.01630 =
         0.02694   -0.00948    0.00220   -0.00189
C7    1    0.295087    0.553958    0.081587    11.00000    0.02146    0.01713 =
         0.02058   -0.00363   -0.00138   -0.00018
AFIX  43
H7    2    0.240055    0.616903    0.029210    11.00000   -1.20000
AFIX   0
C8    1    0.312981    0.451195    0.073698    11.00000    0.01846    0.02033 =
         0.01576   -0.00484   -0.00066   -0.00137
C9    1    0.172271    0.502008   -0.099796    11.00000    0.02890    0.02496 =
         0.01961   -0.00548   -0.00873    0.00440
AFIX 137
H9A   2    0.226284    0.504724   -0.170675    11.00000   -1.50000
H9B   2    0.170403    0.578523   -0.102711    11.00000   -1.50000
H9C   2    0.061881    0.475173   -0.088845    11.00000   -1.50000
AFIX   0
C10   1    0.246213    0.261436   -0.053371    11.00000    0.03203    0.02533 =
         0.01981   -0.01040   -0.00966    0.00530
AFIX  23
H10A  2    0.313736    0.193518   -0.043829    11.00000   -1.20000
H10B  2    0.260845    0.316461   -0.133966    11.00000   -1.20000
AFIX   0
C11   1    0.432814    0.146560    0.166649    11.00000    0.02191    0.02060 =
         0.01930   -0.00846   -0.00092   -0.00025
C12   1    0.557786    0.274290    0.321389    11.00000    0.02255    0.02275 =
         0.01894   -0.00751   -0.00399    0.00093
AFIX  23
H12A  2    0.581693    0.211758    0.298433    11.00000   -1.20000
H12B  2    0.661320    0.306451    0.322527    11.00000   -1.20000
AFIX   0
C13   1    0.039976    0.115505    0.128282    11.00000    0.01960    0.03054 =
         0.03333   -0.01616   -0.00544   -0.00085
C14   1    0.071309    0.001430    0.153158    11.00000    0.02498    0.03185 =
         0.03975   -0.02063   -0.00152   -0.00135
AFIX  43
H14   2    0.092814   -0.021231    0.093809    11.00000   -1.20000
AFIX   0
C15   1    0.071291   -0.079551    0.264474    11.00000    0.02713    0.02735 =
         0.04915   -0.01232    0.00207   -0.00103
AFIX  43
H15   2    0.092997   -0.157347    0.280973    11.00000   -1.20000
AFIX   0
C16   1    0.039822   -0.047292    0.351181    11.00000    0.02527    0.04517 =
         0.03477   -0.00995   -0.00089   -0.00501
AFIX  43
H16   2    0.040144   -0.102633    0.427278    11.00000   -1.20000
AFIX   0
C17   1    0.007812    0.066097    0.326617    11.00000    0.03816    0.05142 =
         0.03628   -0.02397    0.00136   -0.00271
AFIX  43
H17   2   -0.014735    0.088236    0.386271    11.00000   -1.20000
AFIX   0
C18   1    0.008304    0.147625    0.215994    11.00000    0.03408    0.03407 =
         0.04264   -0.02233   -0.00475    0.00181
AFIX  43
H18   2   -0.012937    0.225360    0.199969    11.00000   -1.20000
AFIX   0
C19   1    0.492174   -0.025933    0.150721    11.00000    0.03448    0.01753 =
         0.02562   -0.01140   -0.00519    0.00243
AFIX  23
H19A  2    0.462660   -0.061787    0.103445    11.00000   -1.20000
H19B  2    0.427208   -0.061849    0.224824    11.00000   -1.20000
AFIX   0
C20   1    0.667364   -0.047242    0.167099    11.00000    0.03513    0.03536 =
         0.04484   -0.02314   -0.00756    0.00871
AFIX 137
H20A  2    0.687757   -0.129629    0.204223    11.00000   -1.50000
H20B  2    0.696812   -0.012085    0.214126    11.00000   -1.50000
H20C  2    0.731813   -0.013915    0.093633    11.00000   -1.50000
AFIX   0
C21   1    0.569948    0.138688    0.518114    11.00000    0.04888    0.02675 =
         0.03227   -0.00094   -0.01716    0.00172
AFIX 137
H21A  2    0.511539    0.107507    0.593788    11.00000   -1.50000
H21B  2    0.670411    0.173067    0.518932    11.00000   -1.50000
H21C  2    0.594254    0.077222    0.494842    11.00000   -1.50000
AFIX   0
C22   1    0.308035    0.181663    0.443752    11.00000    0.03264    0.03100 =
         0.02783   -0.01078    0.00370   -0.00580
AFIX 137
H22A  2    0.255731    0.153865    0.521065    11.00000   -1.50000
H22B  2    0.319455    0.118755    0.421710    11.00000   -1.50000
H22C  2    0.242462    0.242568    0.392552    11.00000   -1.50000
AFIX   0
O21   4    0.301213    0.507020    0.469132    11.00000    0.04229    0.03022 =
         0.02559   -0.00994    0.00077    0.00275
O22   4    0.328359    0.320953    0.572613    11.00000    0.07653    0.02929 =
         0.03622   -0.01595    0.00529    0.00523
O23   4    0.034017    0.684327    0.641460    11.00000    0.04493    0.05560 =
         0.06249   -0.04242   -0.01119    0.01350
O24   4    0.174422    0.667002    0.497841    11.00000    0.05316    0.03113 =
         0.04068   -0.01379   -0.00075    0.00704
H3    2    0.225767    0.605508    0.476886    11.00000    0.09112
C23   1    0.261356    0.413109    0.554858    11.00000    0.04073    0.03139 =
         0.02629   -0.01764   -0.00407   -0.00545
C24   1    0.122542    0.413615    0.636682    11.00000    0.04159    0.03498 =
         0.02624   -0.01475   -0.00096   -0.01328
AFIX  43
H24   2    0.078869    0.340634    0.685509    11.00000   -1.20000
AFIX   0
C25   1    0.050639    0.500186    0.651826    11.00000    0.02664    0.04892 =
         0.03106   -0.02151   -0.00318   -0.00594
AFIX  43
H25   2   -0.038923    0.479448    0.707859    11.00000   -1.20000
AFIX   0
C26   1    0.087415    0.624283    0.595402    11.00000    0.02711    0.04135 =
         0.04249   -0.02421   -0.01572    0.00897
 
HKLF 4
 
REM  z in P-1
REM R1 =  0.0337 for   4550 Fo > 4sig(Fo)  and  0.0477 for all   5634 data
REM    350 parameters refined using      0 restraints
 
END  
     
WGHT      0.0400      0.0000 
REM Highest difference peak  0.523,  deepest hole -0.305,  1-sigma level  0.061
Q1    1   0.2753  0.7637  0.1760  11.00000  0.05    0.52
Q2    1   0.4081  0.6348  0.1930  11.00000  0.05    0.49
Q3    1   0.4137  0.4027  0.2635  11.00000  0.05    0.37
Q4    1   0.4151  0.2187  0.1280  11.00000  0.05    0.35
Q5    1   0.4139  0.3067  0.1350  11.00000  0.05    0.34
Q6    1   0.0342  0.1628  0.0654  11.00000  0.05    0.34

;
 
_audit_creation_method            SHELXL-97 
_chemical_name_systematic 
; 
 ? 
; 
_chemical_name_common             ? 
_chemical_melting_point           ? 
_chemical_formula_moiety          'C22 H26 Br N2 O3 S, C4 H3 O4'
_chemical_formula_sum 
 'C26 H29 Br N2 O7 S' 
_chemical_formula_weight          593.48 
 
loop_ 
 _atom_type_symbol 
 _atom_type_description 
 _atom_type_scat_dispersion_real 
 _atom_type_scat_dispersion_imag 
 _atom_type_scat_source 
 'C'  'C'   0.0033   0.0016 
 'International Tables Vol C Tables 4.2.6.8 and 6.1.1.4' 
 'H'  'H'   0.0000   0.0000 
 'International Tables Vol C Tables 4.2.6.8 and 6.1.1.4' 
 'N'  'N'   0.0061   0.0033 
 'International Tables Vol C Tables 4.2.6.8 and 6.1.1.4' 
 'O'  'O'   0.0106   0.0060 
 'International Tables Vol C Tables 4.2.6.8 and 6.1.1.4' 
 'S'  'S'   0.1246   0.1234 
 'International Tables Vol C Tables 4.2.6.8 and 6.1.1.4' 
 'Br'  'Br'  -0.2901   2.4595 
 'International Tables Vol C Tables 4.2.6.8 and 6.1.1.4' 
 
_symmetry_cell_setting            triclinic
_symmetry_space_group_name_H-M    'P -1'
_symmetry_space_group_name_Hall   '-P 1'
 
loop_ 
 _symmetry_equiv_pos_as_xyz 
 'x, y, z' 
 '-x, -y, -z' 
 
_cell_length_a                    8.3812(12) 
_cell_length_b                    13.0305(18) 
_cell_length_c                    13.2656(19) 
_cell_angle_alpha                 64.054(2) 
_cell_angle_beta                  83.078(2) 
_cell_angle_gamma                 86.643(2) 
_cell_volume                      1293.2(3) 
_cell_formula_units_Z             2 
_cell_measurement_temperature     180(2) 
_cell_measurement_reflns_used     3546
_cell_measurement_theta_min       2.448
_cell_measurement_theta_max       26.041
 
_exptl_crystal_description        prism
_exptl_crystal_colour             colourless
_exptl_crystal_size_max           0.25 
_exptl_crystal_size_mid           0.20 
_exptl_crystal_size_min           0.15 
_exptl_crystal_density_meas       ? 
_exptl_crystal_density_diffrn     1.524 
_exptl_crystal_density_method     'not measured' 
_exptl_crystal_F_000              612 
_exptl_absorpt_coefficient_mu     1.719 
_exptl_absorpt_correction_type    multi-scan
_exptl_absorpt_correction_T_min   0.6732 
_exptl_absorpt_correction_T_max   0.7825 
_exptl_absorpt_process_details    'SADABS (Bruker, 2008)'
 
_exptl_special_details 
; 
 ? 
; 
 
_diffrn_ambient_temperature       180(2) 
_diffrn_radiation_wavelength      0.71073 
_diffrn_radiation_type            MoK\a 
_diffrn_radiation_source          'fine-focus sealed tube' 
_diffrn_radiation_monochromator   graphite 
_diffrn_measurement_device_type   'Bruker SMART APEX II'
_diffrn_measurement_method        \w
_diffrn_detector_area_resol_mean  ? 
_diffrn_standards_number          0
_diffrn_standards_interval_count  ? 
_diffrn_standards_interval_time   0
_diffrn_standards_decay_%         0
_diffrn_reflns_number             12386 
_diffrn_reflns_av_R_equivalents   0.0276 
_diffrn_reflns_av_sigmaI/netI     0.0412 
_diffrn_reflns_limit_h_min        -10 
_diffrn_reflns_limit_h_max        10 
_diffrn_reflns_limit_k_min        -16 
_diffrn_reflns_limit_k_max        16 
_diffrn_reflns_limit_l_min        -16 
_diffrn_reflns_limit_l_max        16 
_diffrn_reflns_theta_min          2.45 
_diffrn_reflns_theta_max          27.00 
_reflns_number_total              5634 
_reflns_number_gt                 4550 
_reflns_threshold_expression      I>2\s(I) 
 
_computing_data_collection        '<i>APEX2</i> (Bruker, 2008)'
_computing_cell_refinement        'SAINT (Bruker, 2008)'
_computing_data_reduction         'SAINT (Bruker, 2008)'
_computing_structure_solution     'SHELXTL (Sheldrick, 2008)' 
_computing_structure_refinement   'SHELXTL (Sheldrick, 2008)'
_computing_molecular_graphics     'SHELXTL (Sheldrick, 2008)'
_computing_publication_material   'SHELXTL (Sheldrick, 2008)'
 
_refine_special_details 
; 
 Refinement of F^2^ against ALL reflections.  The weighted R-factor wR and 
 goodness of fit S are based on F^2^, conventional R-factors R are based 
 on F, with F set to zero for negative F^2^. The threshold expression of 
 F^2^ > 2sigma(F^2^) is used only for calculating R-factors(gt) etc. and is 
 not relevant to the choice of reflections for refinement.  R-factors based 
 on F^2^ are statistically about twice as large as those based on F, and R- 
 factors based on ALL data will be even larger. 
; 
 
_refine_ls_structure_factor_coef  Fsqd  
_refine_ls_matrix_type            full 
_refine_ls_weighting_scheme       calc  
_refine_ls_weighting_details 
 'calc w=1/[\s^2^(Fo^2^)+(0.0400P)^2^+0.0000P] where P=(Fo^2^+2Fc^2^)/3' 
_atom_sites_solution_primary      direct 
_atom_sites_solution_secondary    difmap 
_atom_sites_solution_hydrogens    mixed
_refine_ls_hydrogen_treatment     mixed 
_refine_ls_extinction_method      none 
_refine_ls_extinction_coef        ? 
_refine_ls_number_reflns          5634 
_refine_ls_number_parameters      350 
_refine_ls_number_restraints      0 
_refine_ls_R_factor_all           0.0477 
_refine_ls_R_factor_gt            0.0337 
_refine_ls_wR_factor_ref          0.0804 
_refine_ls_wR_factor_gt           0.0759 
_refine_ls_goodness_of_fit_ref    1.071 
_refine_ls_restrained_S_all       1.071 
_refine_ls_shift/su_max           0.001 
_refine_ls_shift/su_mean          0.000 
 
loop_ 
 _atom_site_label 
 _atom_site_type_symbol 
 _atom_site_fract_x 
 _atom_site_fract_y 
 _atom_site_fract_z 
 _atom_site_U_iso_or_equiv 
 _atom_site_adp_type 
 _atom_site_occupancy 
 _atom_site_symmetry_multiplicity 
 _atom_site_calc_flag 
 _atom_site_refinement_flags 
 _atom_site_disorder_assembly 
 _atom_site_disorder_group 
S1 S 0.03458(7) 0.21858(5) -0.01384(5) 0.03160(14) Uani 1 1 d . . . 
Br1 Br 0.33983(3) 0.698291(18) 0.185323(19) 0.02961(8) Uani 1 1 d . . . 
N1 N 0.2588(2) 0.42417(14) -0.00644(14) 0.0205(4) Uani 1 1 d . . . 
N2 N 0.4695(2) 0.22687(15) 0.43757(15) 0.0235(4) Uani 1 1 d . . . 
H2 H 0.456(3) 0.282(2) 0.457(2) 0.035(7) Uiso 1 1 d . . . 
O1 O 0.52121(19) 0.47784(13) 0.32633(13) 0.0257(3) Uani 1 1 d . . . 
H1 H 0.459(3) 0.493(2) 0.369(2) 0.058(10) Uiso 1 1 d . . . 
O2 O 0.45519(18) 0.09553(11) 0.09717(11) 0.0242(3) Uani 1 1 d . . . 
O3 O 0.4526(2) 0.09592(12) 0.26532(12) 0.0312(4) Uani 1 1 d . . . 
C1 C 0.3011(2) 0.31439(17) 0.01533(17) 0.0205(4) Uani 1 1 d . . . 
C2 C 0.3841(2) 0.26690(16) 0.11077(16) 0.0188(4) Uani 1 1 d . . . 
C3 C 0.3929(2) 0.35448(16) 0.14949(16) 0.0187(4) Uani 1 1 d . . . 
C4 C 0.4622(2) 0.36572(16) 0.23638(16) 0.0188(4) Uani 1 1 d . . . 
C5 C 0.4449(2) 0.46870(17) 0.24543(17) 0.0206(4) Uani 1 1 d . . . 
C6 C 0.3609(2) 0.56063(17) 0.16899(18) 0.0218(4) Uani 1 1 d . . . 
C7 C 0.2951(2) 0.55396(17) 0.08159(17) 0.0214(4) Uani 1 1 d . . . 
H7 H 0.2401 0.6169 0.0292 0.026 Uiso 1 1 calc R . . 
C8 C 0.3130(2) 0.45120(17) 0.07370(16) 0.0193(4) Uani 1 1 d . . . 
C9 C 0.1723(3) 0.50201(18) -0.09980(17) 0.0257(5) Uani 1 1 d . . . 
H9A H 0.2263 0.5047 -0.1707 0.038 Uiso 1 1 calc R . . 
H9B H 0.1704 0.5785 -0.1027 0.038 Uiso 1 1 calc R . . 
H9C H 0.0619 0.4752 -0.0888 0.038 Uiso 1 1 calc R . . 
C10 C 0.2462(3) 0.26144(18) -0.05337(17) 0.0251(5) Uani 1 1 d . . . 
H10A H 0.3137 0.1935 -0.0438 0.030 Uiso 1 1 calc R . . 
H10B H 0.2608 0.3165 -0.1340 0.030 Uiso 1 1 calc R . . 
C11 C 0.4328(2) 0.14656(17) 0.16665(17) 0.0208(4) Uani 1 1 d . . . 
C12 C 0.5578(2) 0.27429(17) 0.32139(16) 0.0219(4) Uani 1 1 d . . . 
H12A H 0.5817 0.2118 0.2984 0.026 Uiso 1 1 calc R . . 
H12B H 0.6613 0.3065 0.3225 0.026 Uiso 1 1 calc R . . 
C13 C 0.0400(3) 0.11550(19) 0.12828(19) 0.0267(5) Uani 1 1 d . . . 
C14 C 0.0713(3) 0.00143(19) 0.1532(2) 0.0305(5) Uani 1 1 d . . . 
H14 H 0.0928 -0.0212 0.0938 0.037 Uiso 1 1 calc R . . 
C15 C 0.0713(3) -0.0796(2) 0.2645(2) 0.0366(6) Uani 1 1 d . . . 
H15 H 0.0930 -0.1573 0.2810 0.044 Uiso 1 1 calc R . . 
C16 C 0.0398(3) -0.0473(2) 0.3512(2) 0.0378(6) Uani 1 1 d . . . 
H16 H 0.0401 -0.1026 0.4273 0.045 Uiso 1 1 calc R . . 
C17 C 0.0078(3) 0.0661(2) 0.3266(2) 0.0405(6) Uani 1 1 d . . . 
H17 H -0.0147 0.0882 0.3863 0.049 Uiso 1 1 calc R . . 
C18 C 0.0083(3) 0.1476(2) 0.2160(2) 0.0349(6) Uani 1 1 d . . . 
H18 H -0.0129 0.2254 0.2000 0.042 Uiso 1 1 calc R . . 
C19 C 0.4922(3) -0.02593(17) 0.15072(18) 0.0251(5) Uani 1 1 d . . . 
H19A H 0.4627 -0.0618 0.1034 0.030 Uiso 1 1 calc R . . 
H19B H 0.4272 -0.0618 0.2248 0.030 Uiso 1 1 calc R . . 
C20 C 0.6674(3) -0.0472(2) 0.1671(2) 0.0365(6) Uani 1 1 d . . . 
H20A H 0.6878 -0.1296 0.2042 0.055 Uiso 1 1 calc R . . 
H20B H 0.6968 -0.0121 0.2141 0.055 Uiso 1 1 calc R . . 
H20C H 0.7318 -0.0139 0.0936 0.055 Uiso 1 1 calc R . . 
C21 C 0.5699(3) 0.1387(2) 0.5181(2) 0.0392(6) Uani 1 1 d . . . 
H21A H 0.5115 0.1075 0.5938 0.059 Uiso 1 1 calc R . . 
H21B H 0.6704 0.1731 0.5189 0.059 Uiso 1 1 calc R . . 
H21C H 0.5943 0.0772 0.4948 0.059 Uiso 1 1 calc R . . 
C22 C 0.3080(3) 0.18166(19) 0.44375(19) 0.0316(5) Uani 1 1 d . . . 
H22A H 0.2557 0.1539 0.5211 0.047 Uiso 1 1 calc R . . 
H22B H 0.3195 0.1188 0.4217 0.047 Uiso 1 1 calc R . . 
H22C H 0.2425 0.2426 0.3926 0.047 Uiso 1 1 calc R . . 
O21 O 0.3012(2) 0.50702(14) 0.46913(13) 0.0340(4) Uani 1 1 d . . . 
O22 O 0.3284(2) 0.32095(14) 0.57261(14) 0.0480(5) Uani 1 1 d . . . 
O23 O 0.0340(2) 0.68433(16) 0.64146(17) 0.0484(5) Uani 1 1 d . . . 
O24 O 0.1744(2) 0.66700(15) 0.49784(15) 0.0430(4) Uani 1 1 d . . . 
H3 H 0.226(4) 0.606(3) 0.477(3) 0.091(12) Uiso 1 1 d . . . 
C23 C 0.2614(3) 0.4131(2) 0.55486(19) 0.0307(5) Uani 1 1 d . . . 
C24 C 0.1225(3) 0.4136(2) 0.63668(19) 0.0334(6) Uani 1 1 d . . . 
H24 H 0.0789 0.3406 0.6855 0.040 Uiso 1 1 calc R . . 
C25 C 0.0506(3) 0.5002(2) 0.6518(2) 0.0338(6) Uani 1 1 d . . . 
H25 H -0.0389 0.4794 0.7079 0.041 Uiso 1 1 calc R . . 
C26 C 0.0874(3) 0.6243(2) 0.5954(2) 0.0341(6) Uani 1 1 d . . . 
 
loop_ 
 _atom_site_aniso_label 
 _atom_site_aniso_U_11 
 _atom_site_aniso_U_22 
 _atom_site_aniso_U_33 
 _atom_site_aniso_U_23 
 _atom_site_aniso_U_13 
 _atom_site_aniso_U_12 
S1 0.0309(3) 0.0324(3) 0.0359(3) -0.0163(3) -0.0150(3) 0.0031(2) 
Br1 0.03592(14) 0.01975(12) 0.03535(14) -0.01378(10) -0.00490(10) 0.00055(9) 
N1 0.0237(9) 0.0191(9) 0.0170(9) -0.0056(7) -0.0059(7) 0.0023(7) 
N2 0.0320(11) 0.0184(9) 0.0187(9) -0.0062(8) -0.0062(8) 0.0012(8) 
O1 0.0276(9) 0.0291(9) 0.0253(9) -0.0154(7) -0.0065(7) 0.0006(7) 
O2 0.0352(9) 0.0194(7) 0.0194(8) -0.0094(6) -0.0060(6) 0.0050(6) 
O3 0.0531(11) 0.0223(8) 0.0186(8) -0.0088(7) -0.0102(7) 0.0080(7) 
C1 0.0211(11) 0.0212(10) 0.0171(10) -0.0067(9) -0.0005(8) 0.0002(8) 
C2 0.0205(10) 0.0185(10) 0.0160(10) -0.0065(8) -0.0003(8) -0.0003(8) 
C3 0.0182(10) 0.0178(10) 0.0166(10) -0.0048(8) 0.0002(8) -0.0007(8) 
C4 0.0173(10) 0.0189(10) 0.0167(10) -0.0047(8) -0.0006(8) -0.0011(8) 
C5 0.0194(10) 0.0236(11) 0.0189(11) -0.0090(9) -0.0004(8) -0.0040(8) 
C6 0.0213(11) 0.0163(10) 0.0269(12) -0.0095(9) 0.0022(9) -0.0019(8) 
C7 0.0215(11) 0.0171(10) 0.0206(11) -0.0036(8) -0.0014(8) -0.0002(8) 
C8 0.0185(10) 0.0203(10) 0.0158(10) -0.0048(8) -0.0007(8) -0.0014(8) 
C9 0.0289(12) 0.0250(11) 0.0196(11) -0.0055(9) -0.0087(9) 0.0044(9) 
C10 0.0320(12) 0.0253(11) 0.0198(11) -0.0104(9) -0.0097(9) 0.0053(9) 
C11 0.0219(11) 0.0206(10) 0.0193(11) -0.0085(9) -0.0009(8) -0.0003(8) 
C12 0.0226(11) 0.0227(11) 0.0189(11) -0.0075(9) -0.0040(9) 0.0009(8) 
C13 0.0196(11) 0.0305(12) 0.0333(13) -0.0162(10) -0.0054(9) -0.0008(9) 
C14 0.0250(12) 0.0319(13) 0.0397(14) -0.0206(11) -0.0015(10) -0.0013(9) 
C15 0.0271(13) 0.0274(13) 0.0491(16) -0.0123(12) 0.0021(11) -0.0010(10) 
C16 0.0253(13) 0.0452(15) 0.0348(14) -0.0099(12) -0.0009(10) -0.0050(11) 
C17 0.0382(15) 0.0514(17) 0.0363(15) -0.0240(13) 0.0014(11) -0.0027(12) 
C18 0.0341(14) 0.0341(13) 0.0426(15) -0.0223(12) -0.0047(11) 0.0018(10) 
C19 0.0345(12) 0.0175(11) 0.0256(12) -0.0114(9) -0.0052(9) 0.0024(9) 
C20 0.0351(14) 0.0354(14) 0.0448(15) -0.0231(12) -0.0076(11) 0.0087(11) 
C21 0.0489(16) 0.0267(13) 0.0323(14) -0.0009(10) -0.0172(12) 0.0017(11) 
C22 0.0326(13) 0.0310(13) 0.0278(13) -0.0108(10) 0.0037(10) -0.0058(10) 
O21 0.0423(10) 0.0302(9) 0.0256(9) -0.0099(7) 0.0008(7) 0.0027(7) 
O22 0.0765(14) 0.0293(10) 0.0362(10) -0.0159(8) 0.0053(9) 0.0052(9) 
O23 0.0449(11) 0.0556(12) 0.0625(13) -0.0424(11) -0.0112(9) 0.0135(9) 
O24 0.0532(12) 0.0311(10) 0.0407(11) -0.0138(8) -0.0007(9) 0.0070(8) 
C23 0.0407(14) 0.0314(13) 0.0263(12) -0.0176(11) -0.0041(10) -0.0055(11) 
C24 0.0416(14) 0.0350(14) 0.0262(13) -0.0148(11) -0.0010(11) -0.0133(11) 
C25 0.0266(12) 0.0489(16) 0.0311(13) -0.0215(12) -0.0032(10) -0.0059(11) 
C26 0.0271(13) 0.0414(14) 0.0425(15) -0.0242(12) -0.0157(11) 0.0090(11) 
 
_geom_special_details 
; 
 All esds (except the esd in the dihedral angle between two l.s. planes) 
 are estimated using the full covariance matrix.  The cell esds are taken 
 into account individually in the estimation of esds in distances, angles 
 and torsion angles; correlations between esds in cell parameters are only 
 used when they are defined by crystal symmetry.  An approximate (isotropic) 
 treatment of cell esds is used for estimating esds involving l.s. planes. 
; 
 
loop_ 
 _geom_bond_atom_site_label_1 
 _geom_bond_atom_site_label_2 
 _geom_bond_distance 
 _geom_bond_site_symmetry_2 
 _geom_bond_publ_flag 
S1 C13 1.777(2) . ? 
S1 C10 1.835(2) . ? 
Br1 C6 1.895(2) . ? 
N1 C1 1.363(2) . ? 
N1 C8 1.387(2) . ? 
N1 C9 1.456(2) . ? 
N2 C21 1.483(3) . ? 
N2 C22 1.487(3) . ? 
N2 C12 1.500(3) . ? 
N2 H2 0.86(2) . ? 
O1 C5 1.364(2) . ? 
O1 H1 0.80(3) . ? 
O2 C11 1.344(2) . ? 
O2 C19 1.455(2) . ? 
O3 C11 1.208(2) . ? 
C1 C2 1.395(3) . ? 
C1 C10 1.485(3) . ? 
C2 C3 1.450(3) . ? 
C2 C11 1.468(3) . ? 
C3 C8 1.415(3) . ? 
C3 C4 1.417(3) . ? 
C4 C5 1.396(3) . ? 
C4 C12 1.504(3) . ? 
C5 C6 1.403(3) . ? 
C6 C7 1.380(3) . ? 
C7 C8 1.386(3) . ? 
C7 H7 0.9500 . ? 
C9 H9A 0.9800 . ? 
C9 H9B 0.9800 . ? 
C9 H9C 0.9800 . ? 
C10 H10A 0.9900 . ? 
C10 H10B 0.9900 . ? 
C12 H12A 0.9900 . ? 
C12 H12B 0.9900 . ? 
C13 C14 1.390(3) . ? 
C13 C18 1.392(3) . ? 
C14 C15 1.389(3) . ? 
C14 H14 0.9500 . ? 
C15 C16 1.381(3) . ? 
C15 H15 0.9500 . ? 
C16 C17 1.384(3) . ? 
C16 H16 0.9500 . ? 
C17 C18 1.385(3) . ? 
C17 H17 0.9500 . ? 
C18 H18 0.9500 . ? 
C19 C20 1.502(3) . ? 
C19 H19A 0.9900 . ? 
C19 H19B 0.9900 . ? 
C20 H20A 0.9800 . ? 
C20 H20B 0.9800 . ? 
C20 H20C 0.9800 . ? 
C21 H21A 0.9800 . ? 
C21 H21B 0.9800 . ? 
C21 H21C 0.9800 . ? 
C22 H22A 0.9800 . ? 
C22 H22B 0.9800 . ? 
C22 H22C 0.9800 . ? 
O21 C23 1.281(3) . ? 
O22 C23 1.232(3) . ? 
O23 C26 1.224(3) . ? 
O24 C26 1.306(3) . ? 
O24 H3 1.02(4) . ? 
C23 C24 1.494(3) . ? 
C24 C25 1.329(3) . ? 
C24 H24 0.9500 . ? 
C25 C26 1.488(3) . ? 
C25 H25 0.9500 . ? 
 
loop_ 
 _geom_angle_atom_site_label_1 
 _geom_angle_atom_site_label_2 
 _geom_angle_atom_site_label_3 
 _geom_angle 
 _geom_angle_site_symmetry_1 
 _geom_angle_site_symmetry_3 
 _geom_angle_publ_flag 
C13 S1 C10 101.09(10) . . ? 
C1 N1 C8 109.34(16) . . ? 
C1 N1 C9 125.71(17) . . ? 
C8 N1 C9 124.94(17) . . ? 
C21 N2 C22 111.14(18) . . ? 
C21 N2 C12 109.72(17) . . ? 
C22 N2 C12 113.47(17) . . ? 
C21 N2 H2 107.1(16) . . ? 
C22 N2 H2 107.8(16) . . ? 
C12 N2 H2 107.3(16) . . ? 
C5 O1 H1 111(2) . . ? 
C11 O2 C19 115.42(15) . . ? 
N1 C1 C2 109.47(17) . . ? 
N1 C1 C10 120.02(17) . . ? 
C2 C1 C10 130.30(18) . . ? 
C1 C2 C3 106.86(17) . . ? 
C1 C2 C11 124.81(18) . . ? 
C3 C2 C11 127.92(17) . . ? 
C8 C3 C4 117.27(18) . . ? 
C8 C3 C2 105.95(17) . . ? 
C4 C3 C2 136.74(18) . . ? 
C5 C4 C3 119.29(18) . . ? 
C5 C4 C12 115.83(18) . . ? 
C3 C4 C12 124.88(18) . . ? 
O1 C5 C4 117.24(18) . . ? 
O1 C5 C6 122.04(18) . . ? 
C4 C5 C6 120.60(18) . . ? 
C7 C6 C5 121.83(18) . . ? 
C7 C6 Br1 119.19(15) . . ? 
C5 C6 Br1 118.97(16) . . ? 
C6 C7 C8 116.95(18) . . ? 
C6 C7 H7 121.5 . . ? 
C8 C7 H7 121.5 . . ? 
C7 C8 N1 127.59(18) . . ? 
C7 C8 C3 124.02(19) . . ? 
N1 C8 C3 108.39(17) . . ? 
N1 C9 H9A 109.5 . . ? 
N1 C9 H9B 109.5 . . ? 
H9A C9 H9B 109.5 . . ? 
N1 C9 H9C 109.5 . . ? 
H9A C9 H9C 109.5 . . ? 
H9B C9 H9C 109.5 . . ? 
C1 C10 S1 112.42(15) . . ? 
C1 C10 H10A 109.1 . . ? 
S1 C10 H10A 109.1 . . ? 
C1 C10 H10B 109.1 . . ? 
S1 C10 H10B 109.1 . . ? 
H10A C10 H10B 107.9 . . ? 
O3 C11 O2 121.71(18) . . ? 
O3 C11 C2 124.66(18) . . ? 
O2 C11 C2 113.63(17) . . ? 
N2 C12 C4 111.97(16) . . ? 
N2 C12 H12A 109.2 . . ? 
C4 C12 H12A 109.2 . . ? 
N2 C12 H12B 109.2 . . ? 
C4 C12 H12B 109.2 . . ? 
H12A C12 H12B 107.9 . . ? 
C14 C13 C18 119.3(2) . . ? 
C14 C13 S1 120.32(17) . . ? 
C18 C13 S1 120.32(18) . . ? 
C15 C14 C13 120.3(2) . . ? 
C15 C14 H14 119.9 . . ? 
C13 C14 H14 119.9 . . ? 
C16 C15 C14 120.2(2) . . ? 
C16 C15 H15 119.9 . . ? 
C14 C15 H15 119.9 . . ? 
C15 C16 C17 119.6(2) . . ? 
C15 C16 H16 120.2 . . ? 
C17 C16 H16 120.2 . . ? 
C16 C17 C18 120.7(2) . . ? 
C16 C17 H17 119.7 . . ? 
C18 C17 H17 119.7 . . ? 
C17 C18 C13 119.9(2) . . ? 
C17 C18 H18 120.1 . . ? 
C13 C18 H18 120.1 . . ? 
O2 C19 C20 111.61(18) . . ? 
O2 C19 H19A 109.3 . . ? 
C20 C19 H19A 109.3 . . ? 
O2 C19 H19B 109.3 . . ? 
C20 C19 H19B 109.3 . . ? 
H19A C19 H19B 108.0 . . ? 
C19 C20 H20A 109.5 . . ? 
C19 C20 H20B 109.5 . . ? 
H20A C20 H20B 109.5 . . ? 
C19 C20 H20C 109.5 . . ? 
H20A C20 H20C 109.5 . . ? 
H20B C20 H20C 109.5 . . ? 
N2 C21 H21A 109.5 . . ? 
N2 C21 H21B 109.5 . . ? 
H21A C21 H21B 109.5 . . ? 
N2 C21 H21C 109.5 . . ? 
H21A C21 H21C 109.5 . . ? 
H21B C21 H21C 109.5 . . ? 
N2 C22 H22A 109.5 . . ? 
N2 C22 H22B 109.5 . . ? 
H22A C22 H22B 109.5 . . ? 
N2 C22 H22C 109.5 . . ? 
H22A C22 H22C 109.5 . . ? 
H22B C22 H22C 109.5 . . ? 
C23 O21 H3 113.4(14) . . ? 
C26 O24 H3 112(2) . . ? 
O22 C23 O21 123.7(2) . . ? 
O22 C23 C24 117.6(2) . . ? 
O21 C23 C24 118.6(2) . . ? 
C25 C24 C23 130.1(2) . . ? 
C25 C24 H24 115.0 . . ? 
C23 C24 H24 115.0 . . ? 
C24 C25 C26 130.6(2) . . ? 
C24 C25 H25 114.7 . . ? 
C26 C25 H25 114.7 . . ? 
O23 C26 O24 121.4(2) . . ? 
O23 C26 C25 118.9(2) . . ? 
O24 C26 C25 119.6(2) . . ? 
 
loop_ 
 _geom_torsion_atom_site_label_1 
 _geom_torsion_atom_site_label_2 
 _geom_torsion_atom_site_label_3 
 _geom_torsion_atom_site_label_4 
 _geom_torsion 
 _geom_torsion_site_symmetry_1 
 _geom_torsion_site_symmetry_2 
 _geom_torsion_site_symmetry_3 
 _geom_torsion_site_symmetry_4 
 _geom_torsion_publ_flag 
C8 N1 C1 C2 0.1(2) . . . . ? 
C9 N1 C1 C2 179.31(18) . . . . ? 
C8 N1 C1 C10 175.32(18) . . . . ? 
C9 N1 C1 C10 -5.4(3) . . . . ? 
N1 C1 C2 C3 -0.1(2) . . . . ? 
C10 C1 C2 C3 -174.7(2) . . . . ? 
N1 C1 C2 C11 172.95(18) . . . . ? 
C10 C1 C2 C11 -1.7(3) . . . . ? 
C1 C2 C3 C8 0.1(2) . . . . ? 
C11 C2 C3 C8 -172.68(19) . . . . ? 
C1 C2 C3 C4 -177.4(2) . . . . ? 
C11 C2 C3 C4 9.8(4) . . . . ? 
C8 C3 C4 C5 1.9(3) . . . . ? 
C2 C3 C4 C5 179.2(2) . . . . ? 
C8 C3 C4 C12 -177.18(18) . . . . ? 
C2 C3 C4 C12 0.1(4) . . . . ? 
C3 C4 C5 O1 -176.41(17) . . . . ? 
C12 C4 C5 O1 2.7(3) . . . . ? 
C3 C4 C5 C6 -0.5(3) . . . . ? 
C12 C4 C5 C6 178.67(18) . . . . ? 
O1 C5 C6 C7 174.59(19) . . . . ? 
C4 C5 C6 C7 -1.2(3) . . . . ? 
O1 C5 C6 Br1 -4.6(3) . . . . ? 
C4 C5 C6 Br1 179.69(15) . . . . ? 
C5 C6 C7 C8 1.2(3) . . . . ? 
Br1 C6 C7 C8 -179.65(14) . . . . ? 
C6 C7 C8 N1 -179.56(19) . . . . ? 
C6 C7 C8 C3 0.3(3) . . . . ? 
C1 N1 C8 C7 179.88(19) . . . . ? 
C9 N1 C8 C7 0.6(3) . . . . ? 
C1 N1 C8 C3 0.0(2) . . . . ? 
C9 N1 C8 C3 -179.27(18) . . . . ? 
C4 C3 C8 C7 -1.9(3) . . . . ? 
C2 C3 C8 C7 -179.94(18) . . . . ? 
C4 C3 C8 N1 178.04(17) . . . . ? 
C2 C3 C8 N1 0.0(2) . . . . ? 
N1 C1 C10 S1 -76.8(2) . . . . ? 
C2 C1 C10 S1 97.3(2) . . . . ? 
C13 S1 C10 C1 -62.26(16) . . . . ? 
C19 O2 C11 O3 4.6(3) . . . . ? 
C19 O2 C11 C2 -175.72(16) . . . . ? 
C1 C2 C11 O3 -153.2(2) . . . . ? 
C3 C2 C11 O3 18.4(3) . . . . ? 
C1 C2 C11 O2 27.1(3) . . . . ? 
C3 C2 C11 O2 -161.31(19) . . . . ? 
C21 N2 C12 C4 -179.08(18) . . . . ? 
C22 N2 C12 C4 55.9(2) . . . . ? 
C5 C4 C12 N2 70.4(2) . . . . ? 
C3 C4 C12 N2 -110.5(2) . . . . ? 
C10 S1 C13 C14 -88.93(19) . . . . ? 
C10 S1 C13 C18 92.92(19) . . . . ? 
C18 C13 C14 C15 -0.1(3) . . . . ? 
S1 C13 C14 C15 -178.29(17) . . . . ? 
C13 C14 C15 C16 0.1(3) . . . . ? 
C14 C15 C16 C17 0.2(4) . . . . ? 
C15 C16 C17 C18 -0.5(4) . . . . ? 
C16 C17 C18 C13 0.5(4) . . . . ? 
C14 C13 C18 C17 -0.2(3) . . . . ? 
S1 C13 C18 C17 177.97(18) . . . . ? 
C11 O2 C19 C20 -82.2(2) . . . . ? 
O22 C23 C24 C25 164.7(2) . . . . ? 
O21 C23 C24 C25 -17.2(4) . . . . ? 
C23 C24 C25 C26 -2.3(4) . . . . ? 
C24 C25 C26 O23 -160.9(2) . . . . ? 
C24 C25 C26 O24 19.6(4) . . . . ? 
 
loop_ 
 _geom_hbond_atom_site_label_D 
 _geom_hbond_atom_site_label_H 
 _geom_hbond_atom_site_label_A 
 _geom_hbond_distance_DH 
 _geom_hbond_distance_HA 
 _geom_hbond_distance_DA 
 _geom_hbond_angle_DHA 
 _geom_hbond_site_symmetry_A 
O1 H1 O21  0.80(3) 1.82(3) 2.615(2) 171(3) . 
N2 H2 O22  0.86(2) 1.99(2) 2.712(2) 140(2) . 
O24 H3 O21  1.02(4) 1.44(4) 2.441(2) 169(3) . 
 
_diffrn_measured_fraction_theta_max    0.997 
_diffrn_reflns_theta_full              27.00 
_diffrn_measured_fraction_theta_full   0.997 
_refine_diff_density_max    0.523 
_refine_diff_density_min   -0.305 
_refine_diff_density_rms    0.061 
